1 **Tropical-temperate dichotomy falls apart in the Asian Palmate Group of Araliaceae**

2 Marina Coca-de-la-Iglesia\*<sup>1</sup>, Nagore G. Medina<sup>1,2</sup>, Jun Wen<sup>3</sup>, Virginia Valcárcel<sup>1,2</sup>.

3 <sup>1</sup>Departamento de Biología, Universidad Autónoma de Madrid, Madrid 28049, Spain

4 <sup>2</sup>Centro de Investigación en Biodiversidad y Cambio Global (CIBC-UAM), Universidad  
5 Autónoma de Madrid, Madrid 28049, Spain

6 <sup>3</sup> Department of Botany/MRC 166, Smithsonian Institution, Washington, DC, USA.

7 \*Corresponding author: [marina.coca@inv.uam.es](mailto:marina.coca@inv.uam.es)

8 Manuscript received \_\_\_\_\_; revision accepted \_\_\_\_\_.

9 The tropical-temperate dichotomy in Araliaceae

## 10 **ABSTRACT**

### 11 **PREMISE**

12 The use of climatic data on phylogenetic studies has greatly increased in the last decades. High-  
13 quality spatial data and accurate climatic information are essential to minimize errors in the  
14 climatic reconstructions to the past. However, despite the huge amount of already available  
15 biodiversity digital information, the process of compiling, cleaning, and comparing spatial data  
16 from different open data sources is a time-consuming task that sometimes ends up with low-  
17 quality geographical information. For this reason, researchers often resort qualitative  
18 approximations among which World bioclimatic classification systems or the experts' criteria  
19 are the most used. Our aim is to evaluate the climatic characterization of the genera of the Asian  
20 Palmate Group (AsPG) of the ginseng family (Araliaceae), one of the classical examples of  
21 tropical-temperate plant families.

### 22 **METHODS**

23 We compiled a curated worldwide spatial database of the AsPG genera. We then created five  
24 raster layers representing bioclimatic regionalizations of the World. Finally, we crossed the  
25 database with the layers to characterize the AsPG genera.

### 26 **RESULTS**

27 We found large disagreement in the climatic characterization of genera among regionalizations  
28 and little support for the tropical-temperate dichotomy. Both results are attributed to the  
29 complexity of delimiting tropical, subtropical and temperate climates in the World and to the  
30 distribution of the study group in regions with transitional climatic conditions.

### 31 **CONCLUSIONS**

32 The complexity in the climatic classification of this classical example tropical-temperate  
33 dichotomy, calls for a general revision in other families. In fact, we claim that to properly  
34 evaluate tropical-temperate transitions we cannot ignore the complexity of distribution ranges.

35 **Keywords:** Araliaceae; Asian Palmate Group; data cleaning; Ecoregions; Holdridge's  
36 classification; Köppen's classification; Latitudinal zonation; Metzger's classification; online  
37 biodiversity databases; world climatic regionalization.

## 38 **INTRODUCTION**

39 The use of climatic data on phylogenetic studies has become routine since it often provides  
40 insightful information to better understand the evolutionary history of lineages (see for example,  
41 Pyron and Wiens, 2013; Edwards et al., 2017; Nürk et al., 2018; Albaladejo et al., 2021). To do  
42 so, not only robust phylogenies are needed, but also large amounts of good quality climatic data  
43 (Budic and Dormann, 2015). However, to obtain accurate climatic data and conduct robust  
44 phylogenetic reconstructions good geographical information of the study group distribution is  
45 advocated as the starting input data (Hortal et al., 2007). Because of this, the compilation of  
46 high-quality spatial databases is a cornerstone in these integrative approaches.

47 The huge amount of biodiversity data that have been collected by naturalists and scientists  
48 during the last centuries has been gathered together in online services in last decades and it is  
49 now generally available with just one click (GBIF; GBIF.org, 2021, iNaturalist; iNaturalist,  
50 2021, TRY; Fraser, 2020, Specieslink SpeciesLink, 2021). However, the process from the initial  
51 downloading-click to the final compilation of high-quality spatial databases is often long and  
52 complex. First, it is often necessary to handle large volumes of data that require intense data  
53 cleaning (data parsing and homogenization) before they are ready for analyses. Dealing with  
54 typos and other frequent errors such as, wrong geo-references, incorrect taxonomical  
55 identifications of records or outdated nomenclature, is a very time consuming task of the data  
56 cleaning (Soberón and Peterson, 2004). This is so even in databases like GBIF that contain  
57 categories to facilitate the cleaning of invalid georeferenced records (Yesson et al., 2007). Data

58 homogenization is also a time-consuming step of the data cleaning that may also become a  
59 serious limitation when different online data sources are combined (Turnhout and Boonman-  
60 Berson, 2011). Once the cleaning is done, an evaluation of the representativeness and accuracy  
61 of the spatial database compiled is needed before performing any further analysis. This is an  
62 essential step since online databases do suffer from the fact that our knowledge is incomplete  
63 and/or unevenly distributed across the World and the tree of life (Hortal et al., 2015; Meyer et  
64 al., 2016). For example, well-developed regions, legally protected areas or temperate deciduous  
65 woodlands have traditionally been over sampled (Martin et al., 2012). This sampling bias can be  
66 explained by different factors that have nothing to do with biodiversity itself but have great  
67 impact on data gathering, such as the economic wealth, modern language, geographical location  
68 and security of the region (Amano and Sutherland, 2013). Therefore, to take full advantage of  
69 the enormous potential of online spatial databases we also need to evaluate our gaps of  
70 biodiversity knowledge and consider them in our conclusions (Hortal et al., 2008; Boakes et al.,  
71 2010).

72 As a result, even after a good data cleaning the spatial database compiled may end up revealing  
73 a poor representativeness of the distribution of the study group, and so it should not be used to  
74 describe its climatic niche. Because of this, qualitative approaches are often used to characterize  
75 the climatic preferences of taxa in evolutionary reconstructions. For example, very frequently  
76 taxa are classified according to the climatic categories of a given climatic classification system  
77 (i.e., Köppen & Geiger, 1936) or according to the taxonomist's expert criteria and this  
78 categorization is used as the climatic input data for the phylogenetic reconstructions (see for  
79 example Edwards et al., 2017; Silva et al., 2021). However, the particular climatic classification  
80 used for the categorization is rarely stated (Feeley and Stroud, 2018), and if so, the procedure to  
81 include taxa in one or another category (based on distribution maps, expert criterion, etc.), is  
82 often neglected in the section of materials and methods.

83 Araliaceae is one of the classical examples of tropical-temperate plant families (Judd, 1994).  
84 The largest clade of Araliaceae is the Asian Palmate Group (hereafter AsPG (Plunkett et al.,

85 1996, 2004; Plunkett and Lowry, 2001; Wen et al., 2001) that includes almost half of the genera  
86 (23 genera and c. 950 spp.) in the family and all its North temperate genera (Wen et al., 2001).  
87 The large distribution of the AsPG extends through Southeast Asia, Europe, North Africa, the  
88 Americas and North Oceania. Most of the genera are endemic to Southeast Asia (13), four also  
89 extend to other continents (*Hedera* L. in Europe, *Dendropanax* Decne. & Planch. and  
90 *Oplopanax* (Torr. & A.Gray) Miq. in the Americas, and *Heptapleurum* Gaertn in Oceania), and  
91 the remaining six are endemic to Central and/or South America. Across the worldwide  
92 distribution of the clade, genera also tend to be widespread, as 17 of them expand over large  
93 areas (including intercontinental and transoceanic distributions) and only a few occur in  
94 restricted regions (Frodin and Govaerts, 2003; Fang et al., 2011). According to experts' criteria  
95 (Wen et al., 2001), the clade is mainly tropical, since 16 genera (70%) occur in the tropics or  
96 subtropics while only seven in temperate zones. Interestingly, a seemingly easiness to shift  
97 niches is inferred from molecular phylogenies (Wen et al., 2001; Valcárcel and Wen, 2019),  
98 since temperate genera occur scattered across the AsPG tree which points to independent  
99 acquisition of temperate affinity. However, no explicit evaluation of the climatic  
100 characterization of the AsPG genera has been done so far.

101 Our main objective is to provide the characterization of the climatic preferences of the 23 AsPG  
102 genera by using explicit semi-quantitative approach. To do so, we used online biodiversity  
103 repositories and compiled a worldwide georeferenced database of the AsPG to extract  
104 qualitative climatic data for all the records. To extract qualitative climatic data we created two  
105 raster layers and modified three layers already available to represent the climatic regionalization  
106 of the World according to five bioclimatic classifications frequently used in evolutionary  
107 studies. The specific objectives are to: (1) compile a worldwide high-quality point-occurrence  
108 database that provide an accurate representativeness of the geographical distribution of the  
109 AsPG genera, (2) compile a high-quality climatic database of the AsPG genera, (3) characterize  
110 the geographical range and climatic preferences of the AsPG genera, and (4) evaluate the impact  
111 of using different climatic classifications on the climatic characterization of the AsPG.

## 112 MATERIALS AND METHODS

### 113 *Spatial characterization of the AsPG—*

#### 114 *Spatial data collection—*

115 Eight online databases were used to download the spatial records of the AsPG from March 2018  
116 to April 2020 (Table 1). Downloads were done either through the website (Neotropical Plant  
117 Portal: <https://serv.biokic.asu.edu/neotrop/plantae/>, Neotropical Plant Portal, 2021; NBN:  
118 [nbnatlas.org/](http://nbnatlas.org/), NBN Atlas, 2021; Tropicos: [www.tropicos.org/](http://www.tropicos.org/), Tropicos.org, 2021; TRY:  
119 [www.try-db.org/](http://www.try-db.org/) and WPKorea: [florakorea.myspecies.info/](http://florakorea.myspecies.info/), Chang and Kim, 2015) or using the  
120 available R packages (“rgibf” from GBIF Chamberlain et al., 2020a; DOI references for the  
121 original downloads are available in Zenodo from Coca-de-la-Iglesia et al., 2021a, “BIEN” from  
122 BIEN (Maitner et al., 2018) and “spocc” from iNaturalist (Chamberlain et al., 2020b). Since our  
123 target is to provide a geographical and climatic characterization at genus level, searches for  
124 downloads were done by genus instead of species, except for six genera (*Cephalopanax* G.M.  
125 Plunkett, Lowry & D.A.Neill, *Crepinella* Marchal, *Didymopanax* Decne. & Planch., *Frodinia*  
126 Lowry & G.M. Plunkett, *Heptapleurum*, and *Sciadophyllum* P. Browne). These six genera have  
127 been recently recognized because of a major taxonomical rearrangement of two independent  
128 lineages of the former genus *Schefflera* J. R. Forst. & G. Forst. that were included within the  
129 AsPG (Lowry II et al., 2019; Fiaschi et al., 2020; Lowry II et al., 2020; Lowry II and Plunkett,  
130 2020; Plunkett et al., 2021) . Because of the polyphyly of the former *Schefflera*, the searches for  
131 these six genera were done by species’ names instead of genus. Also, because the taxonomical  
132 rearrangements were published in parallel to our downloading process and nomenclature was  
133 not updated on online databases, these searches were done under the respective *Schefflera*  
134 synonym. To identify which of the former *Schefflera* species belong to the Neotropical and  
135 Asian *Schefflera* clades of the AsPG, we matched the species distribution of all *Schefflera*  
136 species, as recorded in the World Check list of Araliaceae (Frodin and Govaerts, 2003), with the  
137 geographical ranges of the main lineages of the former *Schefflera* described in Plunkett et al.  
138 (2005) and later checked with the synonyms included in the taxonomical rearrangements’.

139 To increase the number of records for poorly represented genera at a global or regional scale in  
140 the online databases used, a targeted search on geo-referenced specimens was done on eight  
141 herbaria (Table 1). Gaps in distribution knowledge persisted for certain genera and/or regions  
142 and were fulfilled by targeted searches of localities in systematic studies (*Trevesia* Vis., *Hedera*,  
143 *Macropanax* Miq., *Sciodaphyllum*, *Gamblea* C.B.Clarke and *Heteropanax* Seem.; Jebb, 1998;  
144 Shang et al., 2000; Jamir and Pandey, 2003; Heriyanto and Sawitri, 2007; Prabhu et al., 2010;  
145 Tagane et al., 2017; Jiménez-Montoya and Idárraga-Piedrahíta, 2018; Ong, 2018; Amini et al.,  
146 2020). Because most of this localities lacked coordinates, a georeferencing process was done  
147 using GeoLocate Web Application (Rios and Bart, 2010). A position point was marked in zones  
148 with the highest probability of appearance of the specie, according to the description of the  
149 locality provided in each record. Google Earth and Google Street View were also used to help  
150 precision.

151 Finally, we extracted the altitude for all records to homogenized or fill the gaps in altitudinal  
152 information. To do so, we grouped the 60 altitudinal files available in WorldClim (30 secs, Fick  
153 and Hijmans, 2017) to form a new layer named “Elevation\_WorldClim\_30sec” that can be  
154 obtained from Zenodo (Coca-de-la-Iglesia et al., 2021b).

#### 155 *Data cleaning—*

156 To clean the spatial data compiled we developed a script in R program (R Core Team, 2018)  
157 that reduces the timing by automating the process (Coca-de-la-Iglesia et al. in prep.) This step of  
158 the process was designed to address two main objectives: (1) homogenize data and remove  
159 duplicates and (2) reduce the effect of spatial uncertainty and non-natural records on the  
160 climatic characterization of genera further conducted with the spatial database.

161 For the first objective, we homogenized the administrative information across all records  
162 according to two types of standardized country codes and using vector layers in QGIS 3.4.3-  
163 Madeira (QGIS Development Team, 2021). We used the coordinates of records to extract the  
164 countries for the third level of TDWG geographical information (Brummitt, 2001) from the

165 layer available in GitHub repository (Desmet and Page, 2007) and the 2-letter ISO-3166-1 code  
166 for each record as obtained from Admin-0 Countries layer of Natural Earth 4.1.0 (Patterson and  
167 Kelso, 2020). This procedure also allowed us to correct country typos in the original data  
168 sources. Then, we proceeded removing the duplicates originated by the compilation of different  
169 online data sources that sometimes share records. We identified duplicates as those that have the  
170 same information for eight fields of the database (species name: "Spp"; collection year: "Year";  
171 country code: "CountryCode"; locality: "Locality"; longitude: "Longitude"; latitude: "Latitude";  
172 elevation; "Elevation"; Specimen voucher or herbaria number: "catalogNumber"; and type of  
173 record: "basisOfRecord"). Once identified, only one of the duplicated records was kept and the  
174 remaining were removed.

175 For the second objective of the data cleaning, we first removed all records that contained spatial  
176 uncertainty. This includes records with none, zero or less than two decimals in their coordinates,  
177 and those with erroneous coordinates. We defined a threshold of 10 km distance from the  
178 coastal line to identify erroneous records. Because of the variability in the land surface limits of  
179 the different layers, we used one of the 19 Worldclim bioclimatic layers (bio1: Annual Mean  
180 Temperature; Fick and Hijmans, 2017; <https://www.worldclim.org/>) to establish the limits of  
181 land surface. Using this layer as template, we removed all records at >10 km distance from  
182 coastal limit. We decided to keep records within the 10 km coastal distance buffer (hereafter  
183 "coastal line records") to avoid the loss of seaboard environments that might be potentially  
184 informative for the climatic characterization of genera. To keep these coastal line records, their  
185 original coordinates were recalculated to meet the nearest climatic cell of the template.

186 Finally, to avoid nuisance in the climatic inferences coming from the inclusion of cultivars and  
187 records outside the natural ranges of genera we identified and removed all non-natural wild  
188 records. We identified cultivated records as those in which the locality description included any  
189 of the following words: "cultivated", "cultivado", "park", "parque", "garden", "jardín", "castel",  
190 "castillo", "golf", "cementerio", "zoo", "farm". Each of the records identified as cultivated was  
191 manually checked before removal. To remove non-native records, we first created a vector to



192 represent the natural range of each genus using the botanical countries of the TDWG  
193 geographical standard (Brummitt, 2001) as the spatial unit. To do so, we used the third level of  
194 TDWG code of the botanical countries of the genus native range as in the World Checklist of  
195 Selected Plant Families (WCSP, Govaerts et al., 2008). These vectors were crossed with the  
196 country code field that included the third level of TDWG code in the database  
197 (“CountryCode\_TDWG”) to remove records from non-matching countries (i.e, records outside  
198 native range).

199 *Spatial data analyses—*

200 To represent the native distribution of the AsPG in the World, a point-occurrence map was  
201 elaborated including all records of the cleaned database. To evaluate the spatial biodiversity  
202 trends at a global scale we built a bubble map by using the botanical countries of the clade as  
203 the spatial units and the number of genera per spatial unit as the value to estimate the size of  
204 bubbles. Then, we built heat maps as a proxy to evaluate sampling effort in the AsPG across the  
205 World. Because global patterns in sampling effort may hinder other patterns at a finer scale, we  
206 decided to build three heat maps: Asia (including Oceania), Europe (including North Africa)  
207 and the Americas. To build each heat map, we used a cell area of one geographical degree as the  
208 spatial unit and the number of records per spatial unit to estimate the sampling effort in each  
209 cell. To categorize cells according to the number of records within a gradient, Jenks natural  
210 breaks were used. To identify sampling hotspots in each region (areas including cells with high  
211 levels of sampling effort), we first estimated the minimum and maximum sampling effort in  
212 each cell category for each heat map. To do so, we compared the minimum and maximum  
213 number of records of each cell category in each region with the maximum number of records  
214 per cell detected in that given region. As a result, we calculated two sampling effort values for  
215 each cell category in each region that represent the range of sampling effort. Cell categories  
216 including 25% of sampling effort within their ranges were considered as sampling hotspots.  
217 Finally, to evaluate temporal sampling patterns across the World in the AsPG we plotted the  
218 accumulated number of occurrences in time per region with “ggplot2” package (Wickham et al.,

219 2021) in R version 3.5 (R Core Team, 2018). We used the three same regions as for the heat  
220 maps. Due to the limited volume of data for years prior to 1900 (1,479 records), occurrences  
221 recorded before that date were not used for the temporal series.

222 To represent the native ranges of the AsPG genera, 23 point maps were elaborated (one per  
223 genus). Also, to evaluate the sampling effort per genus, 23 World heat maps were built  
224 following the same procedure as above described for the clade. Finally, to identify restricted vs.  
225 widespread genera we estimated the area of occupancy (AOO) and the extent of occurrence  
226 (EOO) in km<sup>2</sup> for each genus using a distance of 2 km as the buffer to estimate the AOO, as  
227 recommended by International Union for Conservation of Nature (IUCN, 2012). These  
228 estimates were done in GeoCAT (Bachman et al., 2011) for all genera except for two  
229 (*Dendropanax* and *Hedera*). Because of the large disjunction of *Dendropanax* and the great  
230 number of *Hedera* occurrences their AOO and EOO were estimated in QGIS. In these cases, we  
231 calculated the total area of convex hull created around all occurrences as the estimate for the  
232 EOO. Finally, to identify genera as restricted, we applied the minimum threshold of the IUCN  
233 for the Vulnerable threatened category at global scale (IUCN, 2012). We considered this proxy  
234 as highly conservative to identify restricted genera, since the IUCN categories are intended for  
235 species classification and we are applying this threshold at the genus level.

236 All maps were elaborated with QGIS version 3.4.3-Madeira (QGIS Development Team, 2021)  
237 using the shapefile that includes the third level of TDWG code of botanical countries.

### 238 ***Climatic characterization of the AsPG—***

#### 239 *Climatic data collection and layer compilation—*

240 Climatic data were obtained for all the records in the AsPG database using two different  
241 approaches: qualitative and semiquantitative. For the qualitative approach (hereafter “expert  
242 criterion”), all records from each genus were classified as tropical or temperate according to the  
243 climatic preference as stated by the taxonomists of the family (Plunkett et al., 1996; Wen et al.,  
244 2001).

245 For the semiquantitative approach, the records of the AsPG database were crossed with five  
246 spatial layers representing five bioclimatic regionalizations of the World from analytical and  
247 synthetical classification systems that are frequently used in evolutionary studies. The selected  
248 five World bioclimatic classification systems are: (1) The Latitudinal zonation, that divides the  
249 World in four zones solely based on latitude; (2) Köppen's classification (Köppen and Geiger,  
250 1936) that recognizes six zones mainly based on temperature and precipitation; (3) Holdridge's  
251 classification (Holdridge, 1967) that identifies seven world life zones based on biotemperature  
252 (BioT), which is the temperature at which plants grow efficiently (between 0° C and 30° C); (4)  
253 Metzger's classification (Metzger et al., 2012) that established a Global Environmental  
254 Stratification System with seven broad biomes based on 42 bioclimatic variables; and (5)  
255 Ecoregions' system (Olson et al., 2001) that divides the World in 14 biomes based on  
256 environmental conditions and the biogeographical information of the World's floras and faunas.  
257 To make the genera's climatic characterizations comparable between the most analytical  
258 classification systems (Metzger's classification and Ecoregions' system) and the most synthetic  
259 ones (Latitudinal zonation, Köppen's and Holdridge's classifications), we selected the broadest  
260 hierarchical category of each classification systems as our analysis scale. To cross our database  
261 with each classification system, we needed to adapt three geospatial layers already available  
262 (Ecoregion's: Dinerstein et al., 2017; Köppen's: Beck et al., 2018; Metzger's: Metzger et al.,  
263 2012) and create two new layers for the remaining classification systems (Latitudinal zonation  
264 and Holdridge's classification).

265 To adapt Köppen's layer, we used the improved version to 1 km resolution of traditional  
266 classification of Köppen-Geiger developed by Beck et al., 2018. We grouped the second and  
267 third level of climatic categories to only consider the main classes: Tropical (A), Dry (B),  
268 Temperate (C), Continental (D), Tundra (E) and Polar (F) (available in GitHub:  
269 <https://github.com/vvalnun/Bioclimatic-classifications-AsPG.git>; Coca-de-la-Iglesia et al.,  
270 2021c). For Metzger's classification we used the layer including the global environmental zones  
271 provided in Metzger et al. (2012) to obtain the seven broad biomes and transformed the

272 resulting layer to tif format (available in GitHub: <https://github.com/vvalnun/Bioclimatic->  
273 [classifications-AsPG.git](https://github.com/vvalnun/Bioclimatic-classifications-AsPG.git); Coca-de-la-Iglesia et al., 2021c). In the case of the Ecoregions system,  
274 we used the biomes delimitation of the shapefile available in Dinerstein et al. (2017). Then, we  
275 simplified this classification in R (hereafter “Simplified Ecoregions”) considering two new  
276 inclusive categories that gathered together some of the original categories recognized  
277 (Dinerstein et al., 2017). As a result, we created the “Tropical and subtropical” category that  
278 unified four original biomes (“Tropical and subtropical dry broadleaf forests”, “Tropical and  
279 subtropical moist broadleaf forests”, “Tropical and subtropical coniferous forests” and “Tropical  
280 and subtropical grasslands, savannas, and shrublands”) and the “Temperate” category that  
281 included three original biomes (“Temperate broadleaf and mixed forests”, “Temperate conifer  
282 forests”, and “Temperate grasslands, savannas, and shrublands”) and transformed the resulting  
283 layer to tif format (available in GitHub: <https://github.com/vvalnun/Bioclimatic-classifications->  
284 [AsPG.git](https://github.com/vvalnun/Bioclimatic-classifications-AsPG.git); Coca-de-la-Iglesia et al., 2021c).

285 The new layer created to represent the Latitudinal zonation was built by setting 23.5° as the  
286 geographical limit between tropical and subtropical zones, 40° for subtropical and temperate and  
287 66.5° for temperate and polar, both in northern and southern hemispheres (available in GitHub:  
288 <https://github.com/vvalnun/Bioclimatic-classifications-AsPG.git>; Coca-de-la-Iglesia et al.,  
289 2021c). To build the new layer for Holdridge’s classification we estimated BioT from the 12  
290 layers including the average monthly temperature from 1970 to 2000 at a 30 secs resolution  
291 available in WorldClim (Fick and Hijmans, 2017; <https://www.worldclim.org/>). First, we  
292 reclassified each layer to represent BioT by setting to 0 all temperatures below 0° C and above  
293 30° C and keeping the original temperature value between 0° C and 30° C. With the 12  
294 reclassified monthly layers we created a new layer that contained the mean of BioT. Finally, we  
295 classified BioT values from the mean BioT layer according to the latitudinal World Life zones  
296 recognized by Holdridge (Holdridge, 1967): Tropical (30-24° BioT), Subtropical (24-17° BioT),  
297 Warm Temperate (17-12° BioT), Cool Temperate (12-6° BioT), Boreal (6-3° BioT), Sub-polar  
298 (3,5-1,5° BioT) and Polar (1,5-0° BioT) available in GitHub:

299 <https://github.com/vvalnun/Bioclimate-classifications-AsPG.git>; Coca-de-la-Iglesia et al.,  
300 2021c).

301 Once the five layers were prepared, they were crossed with the spatial database of the AsPG to  
302 assign each record of the database to the corresponding climatic category according to each  
303 classification system.

304 *Climatic characterization of genera—*

305 We provide the characterization of the climatic preferences of the AsPG at two levels (genus  
306 and clade) and according to the six classification systems. For the five classification systems  
307 analyzed with the semi-quantitative approach, we computed the percentage of records classified  
308 within any given category. To avoid overestimations due to taxonomical sampling bias,  
309 percentages for the AsPG climatic characterization at the clade level were done using a reduced  
310 database. In this reduced database all oversampled genera (>1,500 records) were each  
311 represented by 1,000 records regularly selected with the function “spsample” of the package  
312 “sp” (Pebesma et al., 2021) in R version 3.5 (R Core Team, 2018). Pie charts were then  
313 performed from this reduced database for each bioclimatic classification with “ggplot2”  
314 package (Wickham et al., 2021) in R version 3.5 (R Core Team, 2018). To characterize the  
315 climatic preference of each genus, we estimated the percentage of occurrences classified in each  
316 category per genus per classification system. To avoid overestimations due to geographical  
317 sampling bias, percentages were estimated by only retaining one record per coordinate per  
318 genus.

## 319 **RESULTS**

320 *Spatial representativeness of the AsPG database—*

321 The database represents 100% of the AsPG genera, including the most recent taxonomical  
322 rearrangements of the former genus *Schefflera*. It contains 476,704 records resulting from a  
323 cleaning process of an initial database of 683,207 observations and covers the worldwide  
324 distribution range of the clade (Coca-de-la-Iglesia et al., 2021a; Fig. 1). The data cleaning

325 process resulted in losses from 5% (*Metapanax*) to 71% (*Cephalopanax*) of records per genus  
326 (Table 2). *Hedera* is the genus with the highest number of occurrences (401,252; Table 2)  
327 followed by *Oreopanax* with 20,108 (4%; Table 2), and *Dendropanax* with 13,600 records (3%;  
328 Table 2). The genera with the least number of records are *Cephalopanax* (28 occurrences; Table  
329 2) and *Frodingia* (48 occurrences; Table 2). The genus with the highest sampling effort is  
330 *Hedera* with a maximum of 8,093 records per cell while the genera with the lowest sampling  
331 effort are *Cephalopanax* and *Heteropanax* with a maximum of six records per cell in both cases  
332 (Appendix S1; see Supporting Information with this article). Genera point maps encompass the  
333 distribution range of each genus (Appendix S2) and revealed that in 12 genera all the botanical  
334 countries of their native range are represented while the sampling incompleteness of the  
335 remaining 11 varies between 3% in *Didymopanax* and 50% in *Metapanax* where half of the  
336 botanical countries of the natural range are missing.

### 337 *Spatial patterns in the AsPG—*

338 The analysis of spatial diversity in the AsPG reveals that the number of genera is unevenly  
339 distributed across the World (Fig. 2) with Southeast Asia as the area with the highest number of  
340 genera per botanical country, followed by Central and South America. Europe and North  
341 America have the lowest diversity with only one genus per botanical country (Fig. 2).

342 Also, the number of AsPG observations is unevenly distributed across the World (Fig. 3). The  
343 region of the World with the highest number of observations per area is Europe (only  
344 represented by *Hedera*) with a maximum number of observations per cell of 8,093. Most of the  
345 European sampling hotspots (i.e., cells with at least 2024 records that is 25% of the maximum  
346 sampling effort per cell in that area) are from central Europe (western England, France, Belgium  
347 and the Netherlands; Fig. 3A). The second region in terms of observations per area is Asia  
348 (maximum number of observations per cell: 1,469) where two sampling hotspots are identified  
349 (Taiwan and central Japan, Fig. 3B). The region of the World with the least number of records  
350 is America with a maximum number of observations per cell of 979 (Fig. 3C). The American  
351 sampling hotspots are concentrated in four main areas within the continent. Two of these

352 hotspot areas are in Central America, one in southern Mexico and the other one in Panama and  
353 Costa Rica. The third main hotspot area is in South America and expands from western Ecuador  
354 to western Colombia. The fourth American hotspot area is in North America (western  
355 Washington State), where there is only one genus *Oplopanax* belonging to the AsPG clade.

356 Finally, the analyses of sampling patterns across time and space reveal differences in the  
357 number of collections per year between temperate and tropical environments and among regions  
358 of the World (Fig. 4). In Asia, the number of baseline collections per year remained constant  
359 through time with three increases both for tropical and temperate genera according to the expert  
360 criterion (Fig. 4A). In the Americas, the number of collections across time describe very  
361 different temporal pattern whether the genera are tropical or temperate (Fig. 4B). Most of the  
362 temperate collections (only represented by *Oplopanax*) are concentrated in the second decade of  
363 the XXI<sup>st</sup> century (2015 – 2020), whereas a relatively constant high baseline is observed for  
364 collections of the tropical genera during the last decades of the XX<sup>th</sup> century with punctual  
365 increases concentrated in the first decades of the XXI<sup>st</sup> century. Finally, in Europe where only  
366 one temperate genus, *Hedera*, occurs there is an increase of collections since 1990 with a peak  
367 in the first decades of the XXI<sup>st</sup> century (Fig. 4C).

#### 368 ***Comparison of World bioclimatic regionalizations—***

369 The regionalization of the World is very different depending on the bioclimatic classification  
370 system used (Appendix S3). These differences are not evenly distributed across the World or the  
371 climatic categories. Indeed, the regionalization of certain areas like low latitudes in the Northern  
372 Hemisphere are very similar among classifications, whereas the areas of the World that are  
373 classified as Subtropical (when this category is recognized; Holdridge's, Meztger's and  
374 Latitudinal classifications) are either considered tropical, temperate or dry in the remaining  
375 classification systems, which do not recognize the "Subtropical" category (Appendix S3).

376 Besides, the delimitation of the areas considered as tropical or temperate shows major  
377 differences even when classifications that do not recognize the "Subtropical" category are  
378 compared. Despite these major differences, there are two main spatial patterns in the

379 regionalizations of the World across regions that emerge in all the classification systems used.  
380 First, the bioclimatic regions of North America and Australia extend over large continuous  
381 geographical areas describing a clear spatial pattern, either latitudinal or a combination of  
382 latitudinal and longitudinal in the classifications that recognize a “Dry” category (Appendix S3).  
383 Second, for the rest of the World the bioclimatic regions are patchy and extend over  
384 discontinuous geographical areas with no clear latitudinal or longitudinal pattern (Appendix  
385 S3).

### 386 *Spatial and climatic characterization of the AsPG—*

387 The spatial characterization of the genera distribution results in the identification of 11 restricted  
388 genera (*Brassaiopsis* Decne. & Planch., *Cephalopanax*, *Crepinella*, *Frodinia*, *Heteropanax*,  
389 *Macropanax*, *Merrillioanax*, *Metapanax* J.Wen & Frodin, *Sinopanax* H.L.Li, *Tetrapanax*  
390 (K.Koch) K.Koch, and *Trevesia*; Table 2, Appendix S2) and four widespread genera with areas  
391 of occupancy larger than 10,000 km<sup>2</sup> (*Dendropanax*, *Didymopanax*, *Hedera*, and *Oreopanax*  
392 Decne. & Planch.; Table 2).

393 The application of a semi-quantitative approach to characterize the climatic preferences of the  
394 AsPG genera reveals a general tendency for each genus to be classified in more than one  
395 climatic category in most of the classifications systems analyzed (Fig. 5). According to the most  
396 synthetic regionalization (Latitudinal classification; Fig. 5A), 15 genera have more than 75% of  
397 their occurrences classified in one category (hereafter “unequivocally assigned genera”): three  
398 as temperate (*Chengiopanax* C.B.Shang & J.Y.Huang, *Hedera* and *Oplopanax*), eight as  
399 tropical (*Cephalopanax*, *Crepinella*, *Dendropanax*, *Didymopanax*, *Frodinia*, *Oreopanax*,  
400 *Sciadophyllum* and *Trevesia*) and four as subtropical (*Merrillioanax*, *Metapanax*, *Sinopanax*  
401 and *Tetrapanax*). The remaining eight genera have large proportion of records assigned to two  
402 categories (four as tropical and subtropical, four as temperate and subtropical; Fig. 5A). As the  
403 classification becomes more analytical, the number of genera unequivocally assigned to one  
404 category decreases up to 10 in Köppen’s classification or to none in Holdridge’s or Metzger’s  
405 classifications. The only exception is the Simplified Ecoregions classification, where 20 genera



406 are unequivocally assigned to one category (Fig. 5). For the classifications that do not recognise  
407 the “Subtropical” category, most of the non-unequivocally classified genera are assigned to the  
408 “Tropical” and “Temperate” categories (Köppen’s: 10, Simplified Ecoregions: five; Figs. 5B,  
409 5E). For Holdridge’s and Metzger’s classifications, which recognize the “Subtropical” category,  
410 most of the genera classified in more than one category do indeed include the “Subtropical”  
411 category as one of them (Fig. 5C-D).

412 Major differences are detected in the climatic preferences assigned to genera among the five  
413 classifications compared and large discrepancy with the climatic characterization of the expert  
414 criterion (Fig. 5). The classification system that reveals more similarity with the expert criterion  
415 is the Simplified Ecoregions (Fig. 5E), where 19 genera are included in the same category (six  
416 temperate, 13 tropical; see asterisks in Fig. 5E). The classifications that depart the most from the  
417 expert criterion are the other two most analytical ones (Holdridge’s and Metzger’s  
418 classifications), where only one genus is respectively included in a similar category (see genus  
419 with one asterisk in Fig. 5C-D), followed by the more synthetical classification of Köppen-  
420 Geiger with five genera classified in the same category as in the expert criterion (two tropical,  
421 three temperate; see genera with one asterisk in Fig. 5B). In between, the latitudinal  
422 classification recovers 11 similarities (three temperate, eight tropical; see genera with one  
423 asterisk in Fig. 5A) or 19 if the “Subtropical” category is unified with the “Tropical” one (see  
424 double asterisks in Fig. 5A).

425 When projected in a spatial context, the areas of the World where the AsPG occurs are  
426 recognized as different bioclimatic categories depending on the classification used (compare  
427 Fig. 1 and Appendix S3). Indeed, the percentage of AsPG records assigned to each category  
428 varies largely depending on the classification analysed (Fig. 6). For example, when  
429 classifications that recognize the “Subtropical” category are compared, the percentage of  
430 occurrences assigned to the “Tropical” category may vary from only 10% according to  
431 Metzger’s classification (Fig. 6E) to 43% in the latitudinal zonation (Fig. 6B), or between 33%  
432 (Latitudinal zonation, Fig. 6B) and 55% (Holdridge’s classification, Fig. 6D) for the

433 “Temperate” category. Also, the percentage of occurrences assigned to the “Subtropical”  
434 category varies from 16% in Metzger’s classification (Fig. 6E) to 31% in Holdridge’s (Fig. 6D).

## 435 **DISCUSSION**

### 436 *Spatial gaps of knowledge in the AsPG distribution—*

437 After the quality control was done on the spatial data gathered from online data sources to  
438 represent the distribution of the AsPG genera, we needed to fill spatial and taxonomical gaps of  
439 knowledge to avoid reaching misleading biodiversity patterns (Soberón and Peterson, 2004;  
440 Boakes et al., 2010). As a result, we herein provide a comprehensive spatial database that  
441 provides good taxonomical, geographical and temporal coverage of the AsPG at the genus level  
442 (Coca-de-la-Iglesia et al., 2021a; Appendix S2). A bias in sampling effort is detected in our  
443 database with the highest number of sampling hotspots detected in Europe and the lowest in  
444 Asia and America (Fig. 3). Similar geographically-biased patterns towards a better biodiversity  
445 documentation in Europe have already been reported in other studies using digital accessible  
446 information (Boakes et al., 2010; Meyer et al., 2016). However, in the AsPG case the sampling  
447 bias display a spatial pattern that is just the opposite as the biodiversity pattern since Asia,  
448 which is the richest region in terms of genera, arises as the with the region with the least  
449 sampling effort while Europe, which is the region with the lowest diversity in terms of genera,  
450 arises as the area with the highest sampling effort (Fig. 2). This mismatch between biodiversity  
451 documentation and biodiversity pattern have been generally attributed to non-biodiversity  
452 factors (Hortal et al., 2007; Yesson et al., 2007; Amano and Sutherland, 2013; Yang et al.,  
453 2013). Interestingly, a similar mismatch pattern is observed for the AsPG when downsizing the  
454 scale both in Europe and in Asia. Indeed, all European sampling hotspots are in Central Europe,  
455 where only one species of *Hedera* occurs, while Southwestern Europe that harbours the greatest  
456 diversity including all the European continental species of *Hedera* (Valcárcel et al., 2003, 2017)  
457 emerged as an under sampled area. Also, the lowest sampling effort detected in Asia is in  
458 Southwestern continental China (Fig. 3B) which is the area with the greatest AsPG generic  
459 diversity (Fig. 2). This calls for improved economic funding policies to fill our gaps of

460 biodiversity knowledge (Wen et al., 2015, 2017). We propose a two-steps approach targeted on  
461 the areas where sampling effort does not reflect biodiversity patterns, such as Southeastern and  
462 Southwestern Europe or Southwestern Asia in the AsPG case. First, the development of geo-  
463 referencing and digitization projects focused on regional and National herbarium collections to  
464 fill the gaps attributed to insufficient digitization effort or lack of coordinates in specimens'  
465 information, which allows minimizing costs while maximizing efficiency. Then, targeted field  
466 sampling campaigns for the regions where the taxonomical coverage remain poor after the  
467 digitization process. At a global scale, the targeted areas to fill the AsPG geographical gaps are  
468 the boundaries of certain botanical countries in Asia (Bangladesh, Nepal, Bhutan and India; see  
469 *Brassaiopsis*, *Dendropanax*, *Eleutherococcus* Maxim., *Gamblea*, *Heteropanax*, *Macropanax*,  
470 *Merrilliopanax*, *Metapanax* and *Trevesia*) and America (French Guiana: *Dendropanax*;  
471 Uruguay: *Didymopanax* and Surinam: *Oreopanax*; Appendix S1). At a regional scale, our  
472 targeted areas are Southwestern Europe for which the geographical and taxonomical coverage of  
473 our database remains poor.

474 ***Selection of regionalization systems to characterize the climatic preferences of taxa: a matter***  
475 ***of where you are and who you are—***

476 The five bioclimatic classification systems analysed are standard regionalizations of the World's  
477 climate that have been applied to many different purposes. They have been used to respond to  
478 general questions and evaluate general circulation models (Lohmann et al., 1993) or detect  
479 climate change (Beck et al., 2005). Alternatively, they have also been applied for specific  
480 biological approaches, like identification of evolutionary patterns (Anest et al., 2021)  
481 description of macroecological patterns (Ruhí et al., 2013) or setting conservation planning  
482 strategies (Ricketts and Imhoff, 2003). The application in which we focused is the  
483 characterization of climatic preferences of taxa to identify and understand diversity patterns and  
484 the underlying evolutionary history (i.e., Wen et al., 2001; Silva et al., 2021). As important as  
485 climatic information might be to understand the evolutionary history of lineages and the  
486 resulting diversity trends (Kozak and Wiens, 2012), the specific climatic criterion used to

487 determine the preferences of taxa is rarely stated in evolutionary studies (Feeley and Stroud,  
488 2018). While very often *ad hoc* qualitative characterization is done based on expert criterion or  
489 on rough proxies such as the application of the latitudinal criterion (Kozak et al., 2008). This is  
490 so because, the alternative quantitative climatic characterization needs from a high-quality  
491 point-occurrence database with good geographical coverage of the taxa (Hortal et al., 2007,  
492 2015; Meyer et al., 2016), which is generally missing due to our pervasive taxonomical and  
493 geographical gaps of knowledge in most lineages across the tree of life (Meyer et al., 2016). For  
494 these cases, a careful selection of the criterion used for the climatic characterization of taxa  
495 should be done since the application of one or another criterion results in very different  
496 conclusions (Feeley and Stroud, 2018). Our comparative approach confirms previous findings  
497 for the tropics (Feeley and Stroud, 2018) and reveal large differences in the delimitation of the  
498 climatic regions in the World depending on the classification system used. We are aware that  
499 part of these differences rests on the variables used in each system and on how analytical or  
500 synthetical the classification is. However, we herein stress on the part of the discrepancies  
501 among classification systems that is due to the oxymoron of using categorical classification  
502 systems to capture the dynamic and transitional nature of climate. In any case, from the  
503 similarities and differences detected among classifications some patterns emerge that may help  
504 minimizing the impact of our assumptions when using a qualitative proxy to define the climatic  
505 preferences of taxa. First, the climatic affinity occurring at high latitudes in the Northern  
506 Hemisphere are very well captured in all classifications irrespective to the variables used or the  
507 categories recognized (compare Polar in Latitudinal classification, Appendix S3.1; to Tundra  
508 and Frost in Köppen, Appendix S3.2; Subpolar and polar in Holdridge's, Appendix S3.3; Artic  
509 in Meztger's, Appendix S3.4; and Tundra in Simplified ecoregions, Appendix S3.5). As a result,  
510 the selection of one classification system or another may be irrelevant as to reach robust  
511 conclusions for taxa occurring in such latitudes. Second, for the New World (particularly for  
512 North America and Australia), the regionalizations result in regular shapes that describe a clear  
513 latitudinal or the combination of latitudinal and longitudinal pattern when a "Dry" category is  
514 recognized (Appendix S3). This allows delimiting different but compatible continuous

515 bioclimatic regions whether the regionalization used is one or another (Appendix S3). Thus,  
516 classification systems can eventually capture the variation in climatic preferences of taxa from  
517 these areas. In such cases, selection of the best-fitting regionalization is however key to obtain  
518 robust conclusions and ultimately depends on the range of the taxa and the question addressed.  
519 Third, bioclimatic zones in the Old World are irregularly shaped and do not follow any clear  
520 spatial pattern. The impact of irregularly shaped regions on climatic regionalizations has already  
521 been analysed (Aydin et al., 2021) and, as in our study case, result in the delimitation of highly  
522 patchy and incompatible regions based on the different classification systems (Appendix S3).  
523 Therefore, the use of this qualitative proxy to characterize the climatic preference of taxa in the  
524 Old World may be more difficult, in the first place, and may end in conflicting signals leading  
525 to contrasting conclusions whether the classification system chosen is one or another.

526 Interestingly, the fact that major conflicts among classification systems are detected in the areas  
527 of the World that are recognized within a “Subtropical” category may point to the already stated  
528 limitation of the available classification systems to capture the transitional nature of climate. In  
529 fact, this question may be partly responsible for the major differences in perspectives between  
530 biogeographers and phylogeneticists on what and where the tropics are (Feeley and Stroud, 2018).  
531 Consequently, it may also affect our delimitation and understanding of the Temperate zones as  
532 well. Since, tropics are often interpreted as opposed to temperate to explain large scale  
533 biogeographic and diversity patterns (Wiens and Donoghue, 2004), we should be more cautious  
534 on the climatic characterization step in evolutionary studies.

535 *Climatic preferences within the AsPG are not as contrasted as previously stated—*

536 According to the experts’ criteria, 16 genera of the AsPG are tropical while only seven  
537 temperate (Plunkett et al., 1996; Wen et al., 2001). However, this temperate vs. tropical  
538 dichotomy is no longer supported when an explicit evaluation of other climatic classification  
539 systems is done due to two main findings.

540 First, the idea that each genus can be characterized by the unique climatic conditions of one  
541 single category that is implicitly assumed in the expert criterion, is rejected when using our  
542 semiquantitative approach since most of the genera are classified in two or more categories (Fig.  
543 5). Classifying one genus in more than one category can be interpreted as evidence of a broad  
544 climatic niche. Broad climatic preferences are expected for taxa with wide ranges since  
545 geographical extent is correlated to realized climatic niches (Slatyer et al., 2013). However, in  
546 our case study, most of the genera are classified in more than one category in any of the  
547 classification systems (Fig. 5) irrespective of the extension of their geographical ranges (Table  
548 2). Indeed, not only the most widespread genera are assigned to more than one category  
549 (*Didymopanax*, *Dendropanax* or *Oreopanax*, Table 2; Fig. 5B-D), but also most of the genera  
550 with the narrowest distributions (*Cephalopanax*, *Frodonia* or *Merrillioanax*, Table 2; see Fig.  
551 5B-5D). Also, some of the most widespread genera are unequivocally assigned to one category  
552 (*Hedera* or *Oplonanax*, Table 2, Fig 5). In a recent study, Liu et al. (2020) tested multiple  
553 factors to evaluate general hypotheses on climatic niche trends in plants and animals, such as  
554 differential correlation between temperature and precipitation niche breadths across latitude or  
555 the influence of within-locality niche breadth to understand global scale niche breadths. The  
556 consideration of these patterns does not help explaining our contrasting results either, since  
557 latitude does not seem to be related in the AsPG to the number of climatic categories recognised  
558 per genus nor the local niche breadth (Alonso et al., 2021). Interestingly, classifying one genus  
559 in more than one category can be also interpreted as evidence that the categories established in  
560 the classification systems do not capture well the variability of the climatic preferences of the  
561 genus. This does not mean the classification is not robust or accurate enough, it only means that  
562 the regionalization of the World according to the given classification does not reflect the  
563 climatic variability when it comes to represent the geographical range of the genus (note that the  
564 genus range does not necessarily span over the whole area that covers a given category).

565 Second, in most of the AsPG genera that are unequivocally classified in a given category, this  
566 category is different than the “Tropical” or “Temperate” categories recognized in the expert

567 criterion (“Subtropical”, “Warm temperate”, “Cool temperate”, “Continental” or “Boreal”).

568 Indeed, only three genera display similar climatic preferences according to the five

569 classifications and the expert criterion (*Cephalopanax*, *Chengiopanax* and *Hedera*), whereas the

570 remaining genera show large incongruences. Most of the incongruences detected are due to the

571 assignment of the genera to a Subtropical or Warm temperate category in the classification

572 systems that recognise these categories (Holdridge, 1967; Metzger et al., 2012; Figs. 5A, 5C-

573 5D). These two categories reflect intermediate and progressive climatic conditions between the

574 ones that characterize the “Tropical” and “Temperate” or “Cool temperate” categories

575 (Holdridge, 1967; Metzger et al., 2012). Indeed, the regions of the World that are classified

576 within these two intermediate categories (Subtropical and Warm temperate) coincide with areas

577 that are primarily recognised as Tropical or Temperate in the other classifications (Appendix

578 S3). Thus, we interpret that part of the inconsistencies detected among classifications for the

579 climatic characterization of the AsPG genera does not reflect actual incongruences, but an

580 artifact derived from the limitations of the available World regionalizations to capture the

581 transitional and dynamic nature of climate.

582 In the light of our results, we reach two conclusions. First, the climatic characterization of the

583 AsPG genera has an inherent complexity due to the geographical regions where they occur.

584 Second, the application of the expert criterion or any of the other classifications for the climatic

585 characterization of the AsPG genera may lead us to reach inconsistent observations. Therefore,

586 the seemingly easiness of the AsPG lineages to shift climatic niches inferred from the scattered

587 phylogenetic placement of “Temperate” genera in molecular studies (Valcárcel and Wen, 2019;

588 Valcárcel et al. 2014; Wen et al., 2001) needs to be reevaluated by using a quantitative approach

589 rather than a qualitative one. Also, the fact that most of the genera are classified within

590 categories that represent intermediate climatic conditions within this classical example of a

591 tropical-temperate family (Plunkett and Lowry, 2001), calls for a general revision of other cases

592 in Apiales (Plunkett et al., 2004) and in other tropical-temperate plant lineages, such as Vitaceae

593 (Wen et al., 2018; Ma et al., 2021), Altingiaceae (Ickert-Bond and Wen, 2013), *Prunus* (Hodel

594 et al., 2021), and *Raphiolepis* (Liu et al., 2020). Furthermore, our hypotheses from this study  
595 will need to be further tested as more collections become digitized and generally accessible to  
596 the biodiversity community (Wen et al., 2015, 2017; Funk, 2018; Wen and Wagner, 2020).

## 597 **ACKNOWLEDGMENTS**

598 The authors thank R. Li for providing a curated checklist of the former *Schefflera* of the AsPG  
599 and P.P. Lowry II for anticipating the taxonomical rearrangements of the former *Schefflera*  
600 before the papers were published. We also thank A. Gallego-Narbón for taxonomical updates  
601 and I. Datta de Castro for technical support on cluster analysis. We also indebted to the people  
602 who are part of the Writing Workshop developed by the Biology and Ecology Departments of  
603 the Universidad Autónoma de Madrid, for all the comments and discussions that have helped to  
604 realize this work. Finally, we specially thank all scientists, naturalists and botanical enthusiasts  
605 who have contributed to open access databases through botanical collections and observations  
606 during the last centuries, which made this study possible.

607 This study was supported by the Spanish Ministry of Economy, Industry and Competitiveness  
608 [CGL2017-87198-P] and the Spanish Ministry of Science and Innovation [PID2019-106840GA-  
609 C22]. M. Coca de la Iglesia was supported by the Youth Employment Initiative of European  
610 Social Fund and Community of Madrid [PEJ-2017-AI-AMB-6636 and CAM\_2020\_PEJD-  
611 2019-11 PRE/AMB-15871].

## 612 **AUTHOR CONTRIBUTIONS**

613 Database compilation: MC & JW. Data cleaning: MC, NGM, JW & VV. Spatial and climatic  
614 analyses: MC. Methodological design: MC, NGM & VV. Results interpretations and  
615 Manuscript preparation: MC, NGM, JW & VV

## 616 **DATA AVAILABILITY STATEMENT**

617 The AsPG database used in this paper is available at Zenodo Repository:  
618 <https://doi.org/10.5281/zenodo.5578149>.



619 The elevation layer of the World is available in Zenodo Repository:

620 <https://doi.org/10.5281/zenodo.5578234>.

621 The five spatial layers of the bioclimatic classifications used in this paper are available in

622 GitHub Repository: <https://github.com/vvalnun/Bioclimatic-classifications-AsPG.git>.

## 623 LITERATURE CITED

624 Albaladejo, R. G., S. Martín-Hernanz, J. A. Reyes-Betancort, A. Santos-Guerra, M. Olangua-  
625 Corral, and A. Aparicio. 2021. Reconstruction of the spatio-temporal diversification and  
626 ecological niche evolution of *Helianthemum* (Cistaceae) in the Canary Islands using  
627 genotyping-by-sequencing data. *Annals of Botany* 127: 597–611.

628 Alonso, A., A. Gallego-Narbón, M. C. de la Iglesia, D. Monjas, N. G. Medina, M. Fernández-  
629 Mazuecos, and V. Valcárcel. 2021. Climatic niche pre-adaptation in mainland Europe  
630 facilitated the colonization of Madeira by ivies (*Hedera* L., Araliaceae). *bioRxiv*:  
631 2021.07.16.452604; doi: 10.1101/2021.07.16.452604.

632 Amano, T., and W. J. Sutherland. 2013. Four barriers to the global understanding of biodiversity  
633 conservation: wealth, language, geographical location and security. *Proceedings of the*  
634 *Royal Society B: Biological Sciences* 280: 20122649.

635 Amini, E., F. Nasrollahi, A. Sattarian, M. H. Moradkhani, S. Boozarpour, and M. Habibi. 2020.  
636 Micromorphological, anatomical and molecular study of *Hedera* species (Araliaceae) in  
637 Iran. *Acta Biologica Szegediensis* 63: 12.

638 Anest, A., T. Charles-Dominique, O. Maurin, M. Millan, C. Edelin, and K. W. Tomlinson.  
639 2021. Evolving the structure: climatic and developmental constraints on the evolution of  
640 plant architecture. A case study in *Euphorbia*. *New Phytologist* 231: 1278–1295.

- 641 Aydin, O., Mark. V. Janikas, R. M. Assunção, and T.-H. Lee. 2021. A quantitative comparison  
642 of regionalization methods. *International Journal of Geographical Information Science*  
643 35: 2287–2315.
- 644 Bachman, S., J. Moat, A.W. Hill, J. de la Torre, and B. Scott. 2011. Supporting Red List threat  
645 assessments with GeoCAT: geospatial conservation assessment tool. Website  
646 <http://geocat.kew.org/> [accessed 22 June 2021].
- 647 Beck, C., J. Grieser, M. Kottek, F. Rubel, and B. Rudolf. 2005. Characterizing global climate  
648 change by means of Köppen climate classification. *Klimastatusbericht 2005*: 139–149.
- 649 Beck, H. E., N. E. Zimmermann, T. R. McVicar, N. Vergopolan, A. Berg, and E. F. Wood.  
650 2018. Present and future Köppen-Geiger climate classification maps at 1-km resolution.  
651 *Scientific Data* 5: 180214.
- 652 Boakes, E. H., P. J. K. McGowan, R. A. Fuller, D. Chang-qing, N. E. Clark, K. O'Connor, and  
653 G. M. Mace. 2010. Distorted Views of Biodiversity: Spatial and Temporal Bias in  
654 Species Occurrence Data. *PLOS Biology* 8: e1000385.
- 655 Brummitt, R. K. 2001. World geographical scheme for recording plant distributions. ed. 2. Hunt  
656 Inst. for Botanical Documentation, Pittsburgh.
- 657 Budic, L., and C. Dormann. 2015. Climatic niches in phylogenetic comparative studies: a  
658 review of challenges and approaches. *bioRxiv*: 018796; doi: 10.1101/018796.
- 659 Chamberlain, S., D. Oldoni, V. Barve, P. Desmet, L. Geffert, D. Mcglinn, and K. Ram. 2020.  
660 *rgbif*: Interface to the Global 'Biodiversity' Information Facility API.
- 661 Chamberlain, S., K. Ram, T. Hart, and rOpenSci (<https://ropensci.org/>). 2020. *spocc*: Interface  
662 to Species Occurrence Data Sources.

- 663 Chang, C. S., and H. Kim. 2015. The Woody Plants of Korea. Website  
664 <https://florakorea.myspecies.info/ko> [accessed 18 October 2021].
- 665 Coca-de-la-Iglesia, M., N. G. Medina, J. Wen, and V. Valcárcel. 2021a. Spatial and climatic  
666 worldwide database of the Asian Palmate Group of Araliaceae. Zenodo repository:  
667 <https://zenodo.org/record/5578149>. DOI: 10.5281/zenodo.5578149.
- 668 Coca-de-la-Iglesia, M., N. G. Medina, and V. Valcárcel. 2021b. Worldwide elevation layer in  
669 30 seconds spatial resolution. Zenodo repository: <https://zenodo.org/record/5578234>.  
670 DOI: 10.5281/zenodo.5578234.
- 671 Coca-de-la-Iglesia, M., V. Valcárcel, and N. G. Medina. 2021c. Bioclimatic-classifications-  
672 AsPG. GitHub repository: [https://github.com/vvalnun/Bioclimatic-classifications-  
673 AsPG.git](https://github.com/vvalnun/Bioclimatic-classifications-AsPG.git).
- 674 Desmet, P., and R. Page. 2007. World Geographical Scheme for Recording Plant Distributions  
675 (WGSRPD). Github repository: <https://github.com/tdwg/wgsrpd>.
- 676 Dinerstein, E., D. Olson, A. Joshi, C. Vynne, N. D. Burgess, E. Wikramanayake, N. Hahn, et al.  
677 2017. An Ecoregion-Based Approach to Protecting Half the Terrestrial Realm.  
678 *BioScience* 67: 534–545.
- 679 Edwards, E. J., D. S. Chatelet, B.-C. Chen, J. Y. Ong, S. Tagane, H. Kanemitsu, K. Tagawa, et  
680 al. 2017. Convergence, Consilience, and the Evolution of Temperate Deciduous Forests.  
681 *The American Naturalist* 190: S87–S104.
- 682 Fang, J., Z. Wang, and Z. Tang eds. . 2011. Atlas of woody plants in China: distribution and  
683 climate. Springer ; Higher Education Press, Heidelberg ; New York : Beijing.
- 684 Feeley, K. J., and J. T. Stroud. 2018. Where on Earth are the “tropics”? *Frontiers of  
685 Biogeography* 10 (1-2).

- 686 Fiaschi, P., P. P. Lowry, and G. M. Plunkett. 2020. Studies in Neotropical Araliaceae. III.  
687 Resurrection of the New World genus *Didymopanax* Decne. & Planch., previously  
688 included in *Schefflera* (Araliaceae). *Brittonia* 72: 16–22.
- 689 Fick, S. E., and R. J. Hijmans. 2017. WorldClim 2: new 1-km spatial resolution climate surfaces  
690 for global land areas. *International Journal of Climatology* 37: 4302–4315.
- 691 Fraser, L. H. 2020. TRY—A plant trait database of databases. *Global Change Biology* 26: 189–  
692 190.
- 693 Frodin, D. G., and R. Govaerts. 2003. World Checklist and Bibliography of Araliaceae. The  
694 Royal Botanic Gardens, Kew.
- 695 Funk, V. A. 2018. Collections-based science in the 21st Century: Collections-based science in  
696 the 21st Century. *Journal of Systematics and Evolution* 56: 175–193.
- 697 GBIF.org. 2021. GBIF: The Global Biodiversity Information Facility. Website  
698 <https://www.gbif.org/> [accessed 14 July 2021].
- 699 Govaerts, R., J. Dransfield, S. Zona, D. R. Hodel, and A. Henderson. 2008. World Checklist of  
700 Selected Plant Families: Royal Botanic Gardens, Kew. Website  
701 <https://wcp.science.kew.org/home.do> [accessed 14 September 2020].
- 702 Heriyanto, N. M., and R. Sawitri. 2007. Kajian Ekologi Permudaan Saninten (*Castanopsis*  
703 *argentea* (Bl.) A.DC.) di Taman Nasional Gunung Gede Pangrango, Jawa Barat. *Buletin*  
704 *Plasma Nutfah* 13: 34–42.
- 705 Hodel, R. G. J., E. Zimmer, and J. Wen. 2021. A phylogenomic approach resolves the backbone  
706 of *Prunus* (Rosaceae) and identifies signals of hybridization and allopolyploidy.  
707 *Molecular Phylogenetics and Evolution* 160: 107118.
- 708 Holdridge, L. R. 1967. Life zone ecology. Tropical Science Center, San José, Costa Rica.

- 709 Hortal, J., F. de Bello, J. A. F. Diniz-Filho, T. M. Lewinsohn, J. M. Lobo, and R. J. Ladle. 2015.  
710 Seven Shortfalls that Beset Large-Scale Knowledge of Biodiversity. *Annual Review of*  
711 *Ecology, Evolution, and Systematics* 46: 523–549.
- 712 Hortal, J., A. Jiménez-Valverde, J. F. Gómez, J. M. Lobo, and A. Baselga. 2008. Historical bias  
713 in biodiversity inventories affects the observed environmental niche of the species.  
714 *Oikos* 117: 847–858.
- 715 Hortal, J., J. M. Lobo, and A. Jiménez-Valverde. 2007. Limitations of Biodiversity Databases:  
716 Case Study on Seed-Plant Diversity in Tenerife, Canary Islands. *Conservation Biology*  
717 21: 853–863.
- 718 Ickert-Bond, S. M., and J. Wen. 2013. A taxonomic synopsis of Altingiaceae with nine new  
719 combinations. *PhytoKeys* 31: 21–61.
- 720 iNaturalist. 2021. iNaturalist. *iNaturalist*. Website <https://www.inaturalist.org/> [accessed 15 July  
721 2021].
- 722 IUCN. 2012. IUCN Red List categories and criteria, version 3.1, second edition. IUCN.
- 723 Jamir, S. A., and H. N. Pandey. 2003. Vascular plant diversity in the sacred groves of Jaintia  
724 Hills in northeast India. 12: 1497–1510.
- 725 Jebb, M. H. P. 1998. A revision of the genus *Trevesia* (Araliaceae). *Glasra* 3: 85–114.
- 726 Jiménez-Montoya, J., and Á. Idárraga-Piedrahíta. 2018. Novedades taxonómicas del género  
727 *Schefflera* (Araliaceae) para Colombia. *Brittonia* 70: 316–323.
- 728 Judd, W. S. 1994. Angiosperm family pairs: preliminary phylogenetic analyses. *Harvard*  
729 *Papers in Botany* 1: 1–52.
- 730 Köppen, W., and R. Geiger. 1936. Das geographische System der Klimate. Bänden, Bornträger,  
731 Berlin.

- 732 Kozak, K. H., C. H. Graham, and J. J. Wiens. 2008. Integrating GIS-based environmental data  
733 into evolutionary biology. *Trends in Ecology & Evolution* 23: 141–148.
- 734 Kozak, K. H., and J. J. Wiens. 2012. Phylogeny, ecology, and the origins of climate–richness  
735 relationships. *Ecology* 93: S167–S181.
- 736 Liu, B.-B., G.-N. Liu, D.-Y. Hong, and J. Wen. 2020. Eriobotrya Belongs to Rhamphiolepis  
737 (Maleae, Rosaceae): Evidence From Chloroplast Genome and Nuclear Ribosomal DNA  
738 Data. *Frontiers in Plant Science* 10: 1731.
- 739 Liu, H., Q. Ye, and J. J. Wiens. 2020. Climatic-niche evolution follows similar rules in plants  
740 and animals. *Nature Ecology & Evolution* 4: 753–763.
- 741 Lohmann, U., R. Sausen, L. Bengtsson, U. Cubasch, J. Perlwitz, and E. Roeckner. 1993. The  
742 Köppen climate classification as a diagnostic tool for general circulation models.  
743 *Climate Research* 3: 177–193.
- 744 Lowry II, P. P., and G. M. Plunkett. 2020. Resurrection of the Genus Heptapleurum for the  
745 Asian Clade of Species Previously Included in Schefflera (Araliaceae). *Novon, A*  
746 *Journal for Botanical Nomenclature* 28: 143–170.
- 747 Lowry II, P. P., G. M. Plunkett, M. M. Mora, A. Cano, P. Fiaschi, D. G. Frodin, R. E. Gereau, et  
748 al. 2020. Studies in Neotropical Araliaceae. I. Resurrection of the genus Sciodaphyllum  
749 P. Browne to accommodate most New World species previously included in Schefflera  
750 J. R. Forst. & G. Forst. *Brittonia* 72: 1–15.
- 751 Lowry II, P. P., G. M. Plunkett, and D. A. Neill. 2019. Studies in Neotropical Araliaceae. II.  
752 Resurrection of the Neotropical Genus Crepinella for a Clade of New World Species  
753 Previously Included in Schefflera (Araliaceae). *Novon, A Journal for Botanical*  
754 *Nomenclature* 27: 253–261.

- 755 Ma, Z.-Y., Z.-L. Nie, C. Ren, X.-Q. Liu, E. A. Zimmer, and J. Wen. 2021. Phylogenomic  
756 relationships and character evolution of the grape family (Vitaceae). *Molecular*  
757 *Phylogenetics and Evolution* 154: 106948.
- 758 Maitner, B. S., B. Boyle, N. Casler, R. Condit, J. Donoghue, S. M. Durán, D. Guaderrama, et al.  
759 2018. The bien r package: A tool to access the Botanical Information and Ecology  
760 Network (BIEN) database. *Methods in Ecology and Evolution* 9: 373–379.
- 761 Martin, L. J., B. Blossey, and E. Ellis. 2012. Mapping where ecologists work: biases in the  
762 global distribution of terrestrial ecological observations. *Frontiers in Ecology and the*  
763 *Environment* 10: 195–201.
- 764 Metzger, M. J., R. G. H. Bunce, R. H. G. Jongman, R. Sayre, A. Trabucco, and R. Zomer. 2012.  
765 A highresolution bioclimate map of the world: a unifying framework for global  
766 biodiversity research and monitoring. *Global Ecology and Biogeography* 22: 630–638.
- 767 Meyer, C., P. Weigelt, and H. Kreft. 2016. Multidimensional biases, gaps and uncertainties in  
768 global plant occurrence information J. H. R. Lambers [ed.],. *Ecology Letters* 19: 992–  
769 1006.
- 770 NBN Atlas. 2021. NBN Atlas. *NBN Atlas*. Website <https://nbnatlas.org/> [accessed 18 October  
771 2021].
- 772 Neotropical Plant Portal. 2021. Neotropical Plant Portal. Website  
773 <https://serv.biokic.asu.edu/neotrop/plantae/sitemap.php> [accessed 18 October 2021].
- 774 Nürk, N. M., F. Michling, and H. P. Linder. 2018. Are the radiations of temperate lineages in  
775 tropical alpine ecosystems pre-adapted? *Global Ecology and Biogeography* 27: 334–  
776 345.
- 777 Olson, D. M., E. Dinerstein, E. D. Wikramanayake, N. D. Burgess, G. V. N. Powell, E. C.  
778 Underwood, J. A. D'amico, et al. 2001. Terrestrial Ecoregions of the World: A New

- 779 Map of Life on Earth: A new global map of terrestrial ecoregions provides an  
780 innovative tool for conserving biodiversity. *BioScience* 51: 933–938.
- 781 Ong, H. G. 2018. Ethnomedicinal plants and traditional knowledge among three Chin  
782 indigenous groups in Natma Taung National Park (Myanmar). *Journal of*  
783 *Ethnopharmacology* 225: 136–158.
- 784 Patterson, T., and N. V. Kelso. 2020. Natural Earth - Free vector and raster map data at 1:10m,  
785 1:50m, and 1:110m scales. Website <https://www.naturalearthdata.com/> [accessed 19  
786 January 2021].
- 787 Pebesma, E., R. Bivand, B. Rowlingson, V. Gomez-Rubio, R. Hijmans, M. Sumner, D.  
788 MacQueen, et al. 2021. *sp: Classes and Methods for Spatial Data*.
- 789 Plunkett, G. M., and P. P. Lowry. 2001. Relationships among “Ancient Araliads” and Their  
790 Significance for the Systematics of Apiales. *Molecular Phylogenetics and Evolution* 19:  
791 259–276.
- 792 Plunkett, G. M., P. P. Lowry, D. G. Frodin, and J. Wen. 2005. Phylogeny and Geography of  
793 Schefflera: Pervasive Polyphyly in the Largest Genus of Araliaceae. *Annals of the*  
794 *Missouri Botanical Garden* 92: 202–224.
- 795 Plunkett, G. M., P. P. Lowry, and D. A. Neill. 2021. Studies in Neotropical Araliaceae. VII.  
796 Two new genera, *Cephalopanax* and *Frodinia*, to accommodate the remaining species of  
797 Neotropical Schefflera. *Brittonia* 73: 251–261.
- 798 Plunkett, G. M., D. E. Soltis, and P. S. Soltis. 1996. Higher level relationships of Apiales  
799 (Apiaceae and Araliaceae) based on phylogenetic analysis of *rbc L* sequences.  
800 *American Journal of Botany* 83: 499–515.



- 801 Plunkett, G. M., J. Wen, and P. P. Lowry II. 2004. Intrafamilial classifications and characters in  
802 Araliaceae: Insights from the phylogenetic analysis of nuclear (ITS) and plastid (trnL-  
803 trnF) sequence data. *Plant Systematics and Evolution* 245: 1–39.
- 804 Prabhu, S. D., S. K. Barik, H. N. Pandey, and R. S. Tripathi. 2010. Impact of landuse changes  
805 on plant species diversity of Nokrek Biosphere Reserve, Meghalaya, India. *Journal of*  
806 *the Bombay Natural History Society* 107: 13.
- 807 Pyron, R. A., and J. J. Wiens. 2013. Large-scale phylogenetic analyses reveal the causes of high  
808 tropical amphibian diversity. *Proceedings of the Royal Society B: Biological Sciences*  
809 280: 20131622.
- 810 QGIS Development Team. 2021. QGIS Geographic Information System. Open Source  
811 Geospatial Foundation Project.
- 812 R Core Team. 2018. R: A language and environment for statistical computing. R Foundation for  
813 Statistical Computing, Vienna, Austria.
- 814 Ricketts, T., and M. Imhoff. 2003. Biodiversity, Urban Areas, and Agriculture: Locating  
815 Priority Ecoregions for Conservation. *Conservation Ecology* 8: art1.
- 816 Rios, N., and H. L. Bart. 2010. GEOLocate - Software for Georeferencing Natural History Data.  
817 Website <https://www.geo-locate.org/> [accessed 5 August 2021].
- 818 Ruhí, A., D. Boix, S. Gascón, J. Sala, and D. P. Batzer. 2013. Functional and Phylogenetic  
819 Relatedness in Temporary Wetland Invertebrates: Current Macroecological Patterns and  
820 Implications for Future Climatic Change Scenarios D. Fontaneto [ed.], *PLoS ONE* 8:  
821 e81739.
- 822 Shang, C.-B., P. Lowry II, and D. Frodin. 2000. A taxonomic revision and re-definition of the  
823 genus *Gamblea* (Araliaceae). *Adansonia* 22: 45–55.

- 824 Silva, M. dos S., L. S. Funch, L. B. Silva, and D. Cardoso. 2021. A phylogenetic and functional  
825 perspective on the origin and evolutionary shifts of growth ring anatomical markers in  
826 seed plants. *Biological Reviews* 96: 842–876.
- 827 Slatyer, R. A., M. Hirst, and J. P. Sexton. 2013. Niche breadth predicts geographical range size:  
828 a general ecological pattern D. Kleijn [ed.],. *Ecology Letters* 16: 1104–1114.
- 829 Soberón, J., and T. Peterson. 2004. Biodiversity informatics: managing and applying primary  
830 biodiversity data. *Philosophical Transactions of the Royal Society of London. Series B:*  
831 *Biological Sciences* 359: 689–698.
- 832 SpeciesLink. 2021. speciesLink: Sistema de Informação Distribuído para Coleções Biológicas.  
833 *Sistema de Informação Distribuído para Coleções Biológicas*. Website  
834 <http://splink.cria.org.br/> [accessed 29 September 2021].
- 835 Tagane, S., S. Rueangruea, S. Suddee, H. Nagamasu, A. Naiki, and H. Toyama. 2017.  
836 *Heteropanax thaiensis*, a new species and *Schefflera wrayi* (Araliaceae), a new record to  
837 Thailand. *Thai Forest Bulletin (Botany)* 45: 99–104.
- 838 Tropicos.org. 2021. Missouri Botanical Garden. Website <https://www.tropicos.org/home>  
839 [accessed 18 October 2021].
- 840 Turnhout, E., and S. Boonman-Berson. 2011. Databases, Scaling Practices, and the  
841 Globalization of Biodiversity. *Ecology and Society* 16.
- 842 Valcárcel, V., O. Fiz, and P. Vargas. 2003. Chloroplast and nuclear evidence for multiple  
843 origins of polyploids and diploids of *Hedera* (Araliaceae) in the Mediterranean basin.  
844 *Molecular Phylogenetics and Evolution* 27: 1–20.
- 845 Valcárcel, V., B. Guzmán, N. G. Medina, P. Vargas, and J. Wen. 2017. Phylogenetic and  
846 paleobotanical evidence for late Miocene diversification of the Tertiary subtropical  
847 lineage of ivies (*Hedera* L., Araliaceae). *BMC Evolutionary Biology* 17: 146.

- 848 Valcárcel, V., and J. Wen. 2019. Chloroplast phylogenomic data support Eocene amphi-Pacific  
849 early radiation for the Asian Palmate core Araliaceae. *Journal of Systematics and*  
850 *Evolution* 57: 547–560.
- 851 Wen, J., A. Harris, S. M. Ickert-Bond, R. Dikow, K. Wurdack, and E. A. Zimmer. 2017.  
852 Developing integrative systematics in the informatics and genomic era, and calling for a  
853 global Biodiversity Cyberbank: Integrative systematics & Biodiversity Cyberbank.  
854 *Journal of Systematics and Evolution* 55: 308–321.
- 855 Wen, J., A. Harris, Y. Kalburgi, N. Zhang, Y. Xu, W. Zheng, S. M. Ickert-Bond, et al. 2018.  
856 Chloroplast phylogenomics of the New World grape species (*Vitis*, Vitaceae). *Journal*  
857 *of Systematics and Evolution* 56: 297–308.
- 858 Wen, J., S. M. Ickert-Bond, M. S. Appelhans, L. J. Dorr, and V. A. Funk. 2015. Collections-  
859 based systematics: Opportunities and outlook for 2050: Collections-based systematics  
860 2050. *Journal of Systematics and Evolution* 53: 477–488.
- 861 Wen, J., G. M. Plunkett, A. D. Mitchell, and S. J. Wagstaff. 2001. The Evolution of Araliaceae:  
862 A Phylogenetic Analysis Based on ITS Sequences of Nuclear Ribosomal DNA.  
863 *Systematic Botany* 26: 144–167.
- 864 Wen J., and Wagner W. L. 2020. <https://www.jse.ac.cn/CN/10.1111/jse.12707>. *Journal of*  
865 *Systematics and Evolution* 58: 743.
- 866 Wickham, H., W. Chang, L. Henry, T. L. Pedersen, K. Takahashi, C. Wilke, K. Woo, et al.  
867 2021. ggplot2: Create Elegant Data Visualisations Using the Grammar of Graphics.
- 868 Wiens, J. J., and M. J. Donoghue. 2004. Historical biogeography, ecology and species richness.  
869 *Trends in Ecology & Evolution* 19: 639–644.

- 870 Yang, W., K. Ma, and H. Kreft. 2013. Geographical sampling bias in a large distributional  
 871 database and its effects on species richness–environment models. *Journal of*  
 872 *Biogeography* 40: 1415–1426.
- 873 Yesson, C., P. W. Brewer, T. Sutton, N. Caithness, J. S. Pahwa, M. Burgess, W. A. Gray, et al.  
 874 2007. How Global Is the Global Biodiversity Information Facility? J. Beach [ed.],  
 875 *PLoS ONE* 2: e1124.

876

877 **TABLES**

- 878 Table 1. Summary of the compilation and cleaning information of spatial database of the Asian  
 879 Palmate Group of Araliaceae (AsPG).

| <b>Original source</b>      | <b>Records before<br/>cleaning</b> | <b>Records after<br/>cleaning</b> | <b>% of records</b> |
|-----------------------------|------------------------------------|-----------------------------------|---------------------|
| <b>Online databases</b>     | <b>679,857</b>                     | <b>471,811</b>                    | <b>99.89</b>        |
| GBIF <sup>1</sup>           | 633,315                            | 448,846                           | 94.17               |
| BIEN                        | 30,558                             | 167,93                            | 3.52                |
| NBN                         | 8,871                              | 4,870                             | 1.02                |
| iNaturalist                 | 6,212                              | 3,739                             | 0.78                |
| Neotropical Plant Portal    | 1,560                              | 1,119                             | 0.23                |
| Tropicos                    | 690                                | 643                               | 0.13                |
| WPKorea                     | 143                                | 132                               | 0.03                |
| TRY                         | 68                                 | 52                                | 0.01                |
| <b>Herbaria<sup>2</sup></b> | <b>426</b>                         | <b>379</b>                        | <b>0.08</b>         |
| AVH                         | 11                                 | 7                                 | -                   |
| CVH                         | 134                                | 111                               | -                   |
| E                           | 79                                 | 68                                | -                   |

|                               |            |            |             |
|-------------------------------|------------|------------|-------------|
| US                            | 121        | 120        | -           |
| MO                            | 58         | 52         | -           |
| NYBG                          | 22         | 20         | -           |
| K                             | 1          | 1          | -           |
| <b>Literature<sup>2</sup></b> | <b>145</b> | <b>131</b> | <b>0.03</b> |

---

880 1. DOI references for the original downloads are available in Zenodo (Coca-de-la-Iglesia et al.,

881 2021a).

882 2. Records not uploaded in any of the online databases analyzed.

883 Table 2. Spatial information of the genera of the Asian Palmate Group (AsPG) of Araliaceae. NSpp: Number of accepted species for each genus. Range:  
884 Distribution range. N<sub>dow</sub>: Number of records downloaded. N<sub>red</sub>: Number of records kept after the data cleaning. Loss: Percentage of data loss during the data  
885 cleaning. RepGen: Percentage of records per genus in the AsPG database. RepSpp: Percentage of species recorded per genus in the AsPG database.  
886 NBcountry: Number of botanical countries of the natural range of each genus. SamInc: Sampling incompleteness, estimated as the percentage of botanical  
887 countries of the natural distribution of the each genus not represented in the AsPG database. AOO: Area of occupancy in km<sup>2</sup>. EOO: Extent of occurrence in  
888 km<sup>2</sup>.

| <b>Genus</b>        | <b>N<sup>Spp</sup></b> | <b>Range</b>                     | <b>N<sup>dow</sup></b> | <b>N<sup>red</sup></b> | <b>Loss<br/>(%)</b> | <b>Rep<sup>Gen</sup><br/>(%)</b> | <b>Rep<sup>Spp</sup><br/>(%)</b> | <b>N<sup>Bcountry</sup></b> | <b>SamInc<br/>(%)</b> | <b>AOO</b> | <b>EOO</b> |
|---------------------|------------------------|----------------------------------|------------------------|------------------------|---------------------|----------------------------------|----------------------------------|-----------------------------|-----------------------|------------|------------|
| <i>Brassaiopsis</i> | 48                     | Asia                             | 1062                   | 953                    | 10,26               | 0,20                             | 64,58                            | 21                          | 9,52                  | 1108       | 9,85E+06   |
| <i>Cephalopanax</i> | 3                      | South America                    | 98                     | 28                     | 71,43               | 0,01                             | 100,00                           | 2                           | 0,00                  | 88         | 1,74E+05   |
| <i>Chengiopanax</i> | 2                      | Asia                             | 1178                   | 1072                   | 9,00                | 0,22                             | 100,00                           | 3                           | 0,00                  | 2864       | 3,77E+06   |
| <i>Crepinella</i>   | 33                     | South America                    | 1115                   | 788                    | 29,33               | 0,17                             | 96,97                            | 7                           | 0,00                  | 1292       | 5,71E+06   |
| <i>Dendropanax</i>  | 103                    | Asia, Central &<br>South America | 21914                  | 13600                  | 37,94               | 2,85                             | 91,26                            | 51                          | 7,84                  | 22132      | 2,32E+08   |
| <i>Didymopanax</i>  | 37                     | Central & South<br>America       | 10483                  | 8788                   | 16,17               | 1,84                             | 100,00                           | 32                          | 3,13                  | 17552      | 2,11E+07   |

|                        |     |                 |        |        |       |       |        |    |       |        |          |
|------------------------|-----|-----------------|--------|--------|-------|-------|--------|----|-------|--------|----------|
| <i>Eleutherococcus</i> | 38  | Asia            | 5704   | 4704   | 17,53 | 0,99  | 76,32  | 21 | 4,76  | 6796   | 1,35E+07 |
| <i>Fatsia</i>          | 3   | Asia            | 2826   | 877    | 68,97 | 0,18  | 66,67  | 6  | 0,00  | 2068   | 1,28E+06 |
| <i>Frodinia</i>        | 2   | Central America | 54     | 48     | 11,11 | 0,01  | 100,00 | 3  | 0,00  | 92     | 4,50E+04 |
| <i>Gamblea</i>         | 4   | Asia            | 1112   | 955    | 14,12 | 0,20  | 100,00 | 13 | 23,08 | 2188   | 1,06E+07 |
| <i>Hedera</i>          | 12  | Europe, North   | 576291 | 401252 | 30,37 | 84,17 | 100,00 | 68 | 7,35  | 190564 | 4,95+07  |
|                        |     | Africa & Asia   |        |        |       |       |        |    |       |        |          |
| <i>Heptapleurum</i>    | 317 | Asia & North    | 8201   | 6371   | 22,31 | 1,34  | 58,68  | 34 | 8,82  | 9632   | 4,03E+07 |
|                        |     | Oceania         |        |        |       |       |        |    |       |        |          |
| <i>Heteropanax</i>     | 10  | Asia            | 228    | 168    | 26,32 | 0,04  | 70,00  | 15 | 33,33 | 328    | 3,22E+06 |
| <i>Kalopanax</i>       | 1   | Asia            | 2117   | 1611   | 23,90 | 0,34  | 100,00 | 10 | 0,00  | 3808   | 6,30E+06 |
| <i>Macropanax</i>      | 17  | Asia            | 471    | 392    | 16,77 | 0,08  | 70,59  | 17 | 23,53 | 908    | 1,02E+07 |
| <i>Merrillioanax</i>   | 3   | Asia            | 170    | 158    | 7,06  | 0,03  | 100,00 | 6  | 33,33 | 184    | 3,02E+05 |
| <i>Metapanax</i>       | 2   | Asia            | 938    | 894    | 4,69  | 0,19  | 100,00 | 6  | 50,00 | 568    | 1,20E+06 |
| <i>Oplopanax</i>       | 3   | Asia & North    | 4289   | 3941   | 8,11  | 0,83  | 100,00 | 14 | 0,00  | 6200   | 1,29E+07 |
|                        |     | America         |        |        |       |       |        |    |       |        |          |

|                      |     |                            |       |       |       |      |        |    |       |       |          |
|----------------------|-----|----------------------------|-------|-------|-------|------|--------|----|-------|-------|----------|
| <i>Oreopanax</i>     | 148 | Central & South<br>America | 30168 | 20108 | 33,35 | 4,22 | 97,30  | 35 | 2,86  | 18980 | 2,58E+07 |
| <i>Sciodaphyllum</i> | 138 | Central & South<br>America | 12614 | 8874  | 29,65 | 1,86 | 92,75  | 14 | 0,00  | 8512  | 8,32E+06 |
| <i>Sinopanax</i>     | 1   | Asia                       | 119   | 111   | 6,72  | 0,02 | 100,00 | 1  | 0,00  | 288   | 1,30E+04 |
| <i>Tetrapanax</i>    | 1   | Asia                       | 1676  | 716   | 57,28 | 0,15 | 100,00 | 4  | 0,00  | 880   | 2,26E+06 |
| <i>Trevesia</i>      | 11  | Asia & North<br>Oceania    | 367   | 293   | 20,16 | 0,06 | 90,91  | 17 | 23,53 | 688   | 9,30E+06 |



890 **SUPPORTING INFORMATION**

891 Appendix S1 – Heat maps of Asian Palmate Group genera

892 Appendix S2 – Distribution maps of Asian Palmate Group genera

893 Appendix S3 – World regionalizations

894 **FIGURE CAPTIONS**

895 Figure 1. Global point-occurrence map representing the geographical distribution of Asian  
896 Palmate Group of Araliaceae.

897 Figure 2. Biodiversity map of the Asian Palmate Group of Araliaceae as estimated from the  
898 number of genera per botanical country. The bubble colour depends on the climatic preferences  
899 of the genera recorded in each botanical country and according to the experts' criteria (Plunkett  
900 et al., 1996; Wen et al., 2001): Blue represents botanical countries where only temperate genera  
901 are recorded, red those for which only tropical genera are recorded, and green those including  
902 records from temperate and tropical genera.

903 Figure 3. Heat maps of the Asian Palmate Group of Araliaceae based on the total number of  
904 point-occurrences per cell (one geographical degree of longitude and latitude). Cells are  
905 coloured based on a gradient scale established by Jenks natural breaks. Colour ranges from blue  
906 (least number of occurrences per area) to red (highest number of occurrences per area). (A)  
907 Europe (including North Africa), with a hotspot area located in the centre of the continent. The  
908 four last cell categories (from pale yellow -1,710 to 2,315 records- to red -6,240 to 8,093  
909 records-) are identified as sampling hotspots (cells with 25% of the maximum sampling effort  
910 per cell per region, see Materials and methods). (B) Asia (including Oceania), with two main  
911 hotspot areas located in islands (Taiwan and Japan). The three last cell categories (from yellow -  
912 305 to 598 records- to red -1,620 to 1,469 records-) are identified as sampling hotspots. (C)  
913 America, with four main hotspot areas from North America to Colombia. The three last cell

914 categories (from yellow -202 to 396 records- to red -656 to 979 records-) are identified as  
915 sampling hotspots.

916 Figure 4. Temporal evolution of the number of occurrences included in the Asian Palmate  
917 Group of Araliaceae database between 1900 and 2020 by regions. Colours represent the  
918 temporal tendencies detected in the sampling records of temperate (blue) or tropical (red) genera  
919 according to the experts' criteria (Plunkett et al. 1996, Wen et al. 2001). Dashed vertical lines  
920 indicate the cumulative frequencies of 25, 50 and 75 percentages of the total data. (A)  
921 Cumulative temporal series in Asia (including Oceania). (B) Cumulative temporal series in  
922 America. (C) Cumulative temporal series in Europe (including Africa), where only the  
923 temperate genus *Hedera* occurs.

924 Figure 5. Climatic characterization of the 23 genera of the Asian Palmate Group (AsPG) of  
925 Araliaceae according to five bioclimatic regionalization systems of the World. The names of  
926 AsPG genera in the first axis are coloured according to experts' criteria (tropical in red and  
927 temperate in blue; Plunkett et al. 1996, Wen et al. 2001). One asterisk indicates the genera for  
928 which the classification system assigned a climatic categorization congruent with the one  
929 assigned in the experts' criteria. Two asterisks indicate the congruence with the "Tropical"  
930 category of the experts' criteria when unifying the subtropical and the tropical proportions in the  
931 classification system. (A) Latitudinal zonation. (B) Köppen's classification based on  
932 temperature and precipitation (Köppen and Geiger, 1936; Beck et al., 2018). (C) Holdridge's  
933 classification based on Biotemperature (Holdridge, 1967). The congruence with the  
934 "Temperate" category of the experts' criteria is done by considering the Cold and Warm  
935 temperate categories together and it is also denoted with two asterisks. (D) Metzger's  
936 classification based on 42 bioclimatic variables (Metzger et al., 2012). Congruence with the  
937 "Temperate" category of the experts' criteria is done by considering the Cold and Warm  
938 temperate categories together and it is also denoted with two asterisks. (E) Simplified  
939 Ecoregions classification based on environmental conditions and the biogeographical  
940 information of the World's floras and faunas (modified from Dinerstein et al., 2017). "Tropical

941 and Subtropical” category unifies four original biomes of the Dinerstein regionalization  
942 (“Tropical and subtropical dry broadleaf forests”, “Tropical and subtropical moist broadleaf  
943 forests”, “Tropical and subtropical coniferous forests” and “Tropical and subtropical grasslands,  
944 savannas, and shrublands”). “Temperate” category includes three original biomes of Dinerstein  
945 regionalization (“Temperate broadleaf and mixed forests”, “Temperate conifer forests”, and  
946 “Temperate grasslands, savannas, and shrublands”).

947 Figure 6. Climatic characterization of the Asian Palmate Group of Araliaceae according to five  
948 bioclimatic regionalization systems of the World and the experts’ criteria (Plunkett et al., 1996;  
949 Wen et al., 2001). Categories represented by less than 0,1% of the total records are not  
950 represented. Categories represented by less than 1% of the total records are grouped under the  
951 undefined category "Others". (A) Experts’ criteria (Plunkett et al., 1996; Wen et al., 2001). (B)  
952 Latitudinal zonation. (C) Köppen’s classification based on temperature and precipitation  
953 (Köppen and Geiger, 1936; Beck et al., 2018). (D) Holdridge’s classification based on  
954 Biotemperature (Holdridge, 1967). (E) Metzger’s classification based on 42 bioclimatic  
955 variables (Metzger et al., 2012). (F) Simplified Ecoregions classification based on  
956 environmental conditions and the biogeographical information of the World’s floras and faunas  
957 (modified from Dinerstein et al., 2017). “Tropical and Subtropical” category unifies four  
958 original biomes of the Dinerstein regionalization (“Tropical and subtropical dry broadleaf  
959 forests”, “Tropical and subtropical moist broadleaf forests”, “Tropical and subtropical  
960 coniferous forests” and “Tropical and subtropical grasslands, savannas, and shrublands”).  
961 “Temperate” category includes three original biomes of Dinerstein regionalization (“Temperate  
962 broadleaf and mixed forests”, “Temperate conifer forests”, and “Temperate grasslands,  
963 savannas, and shrublands”).

964

965 Figure 1.

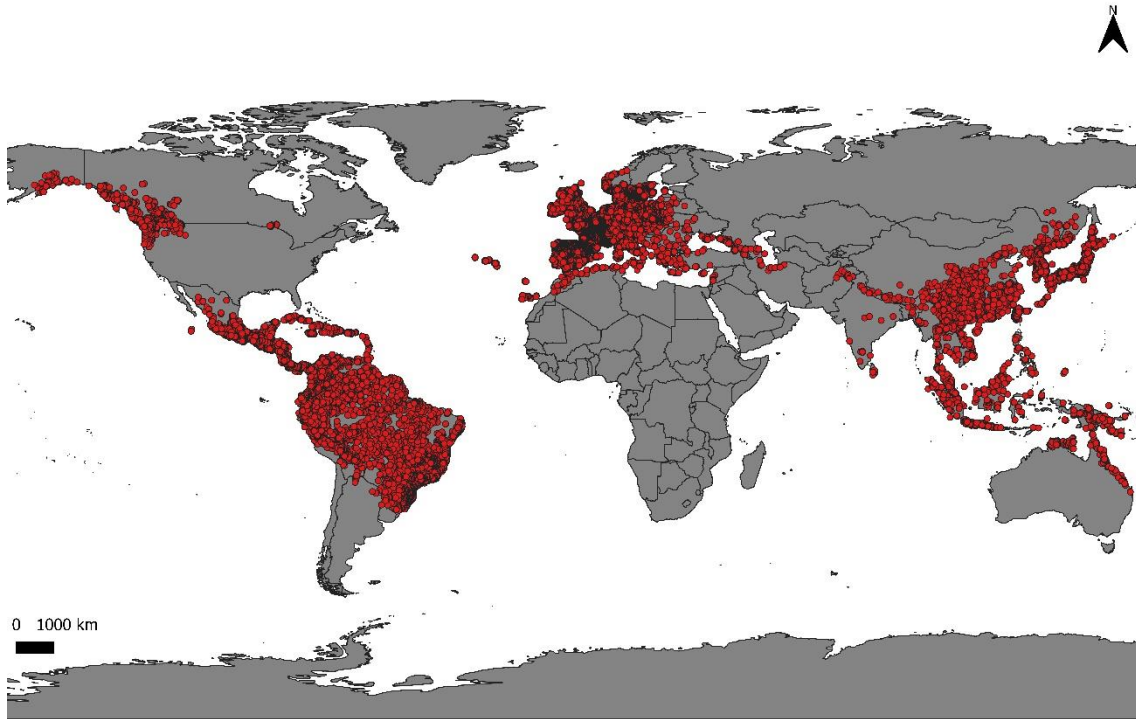

966

967 Figure 2.

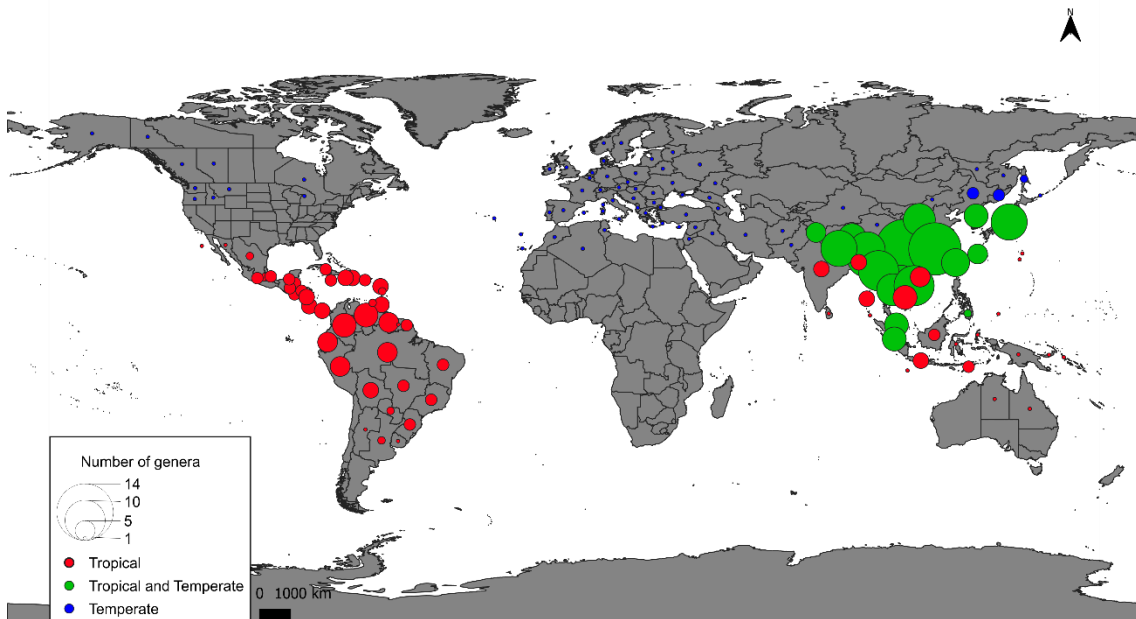

968

969

970 Figure 3.

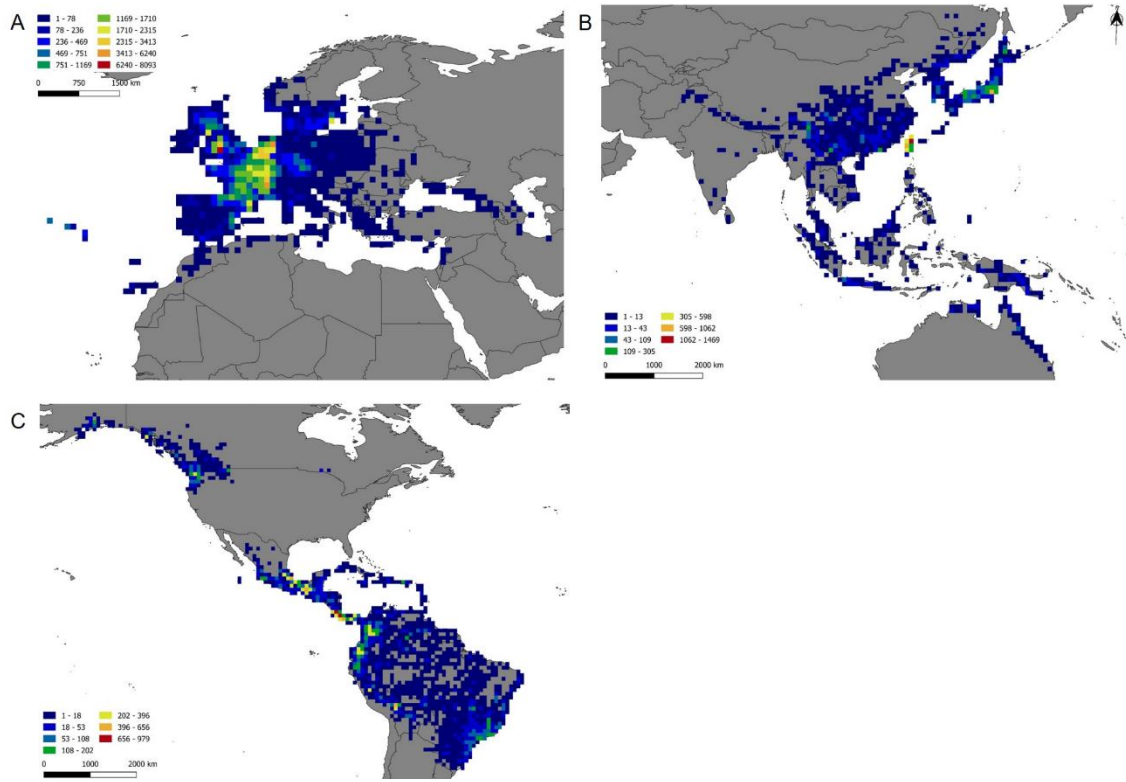

971

972

973 Figure 4.

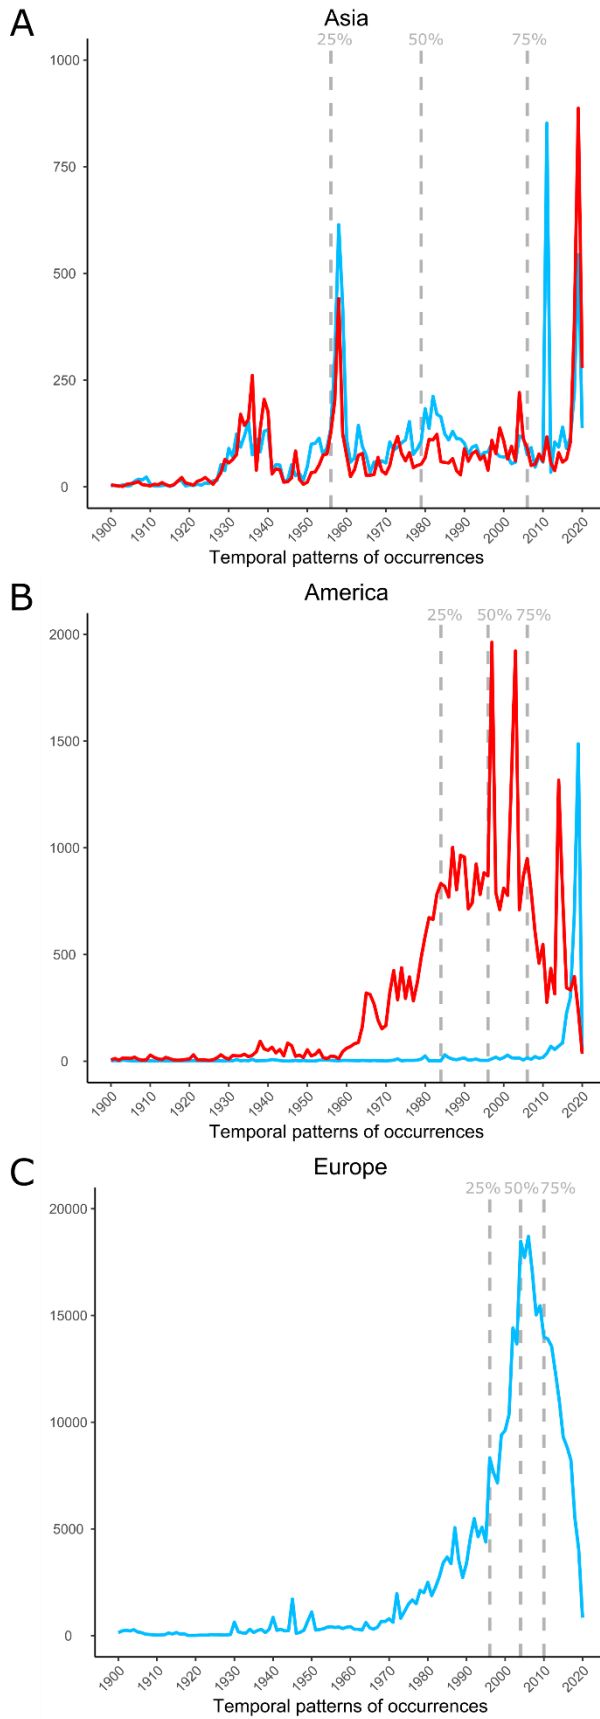

974

975

976 Figure 5.

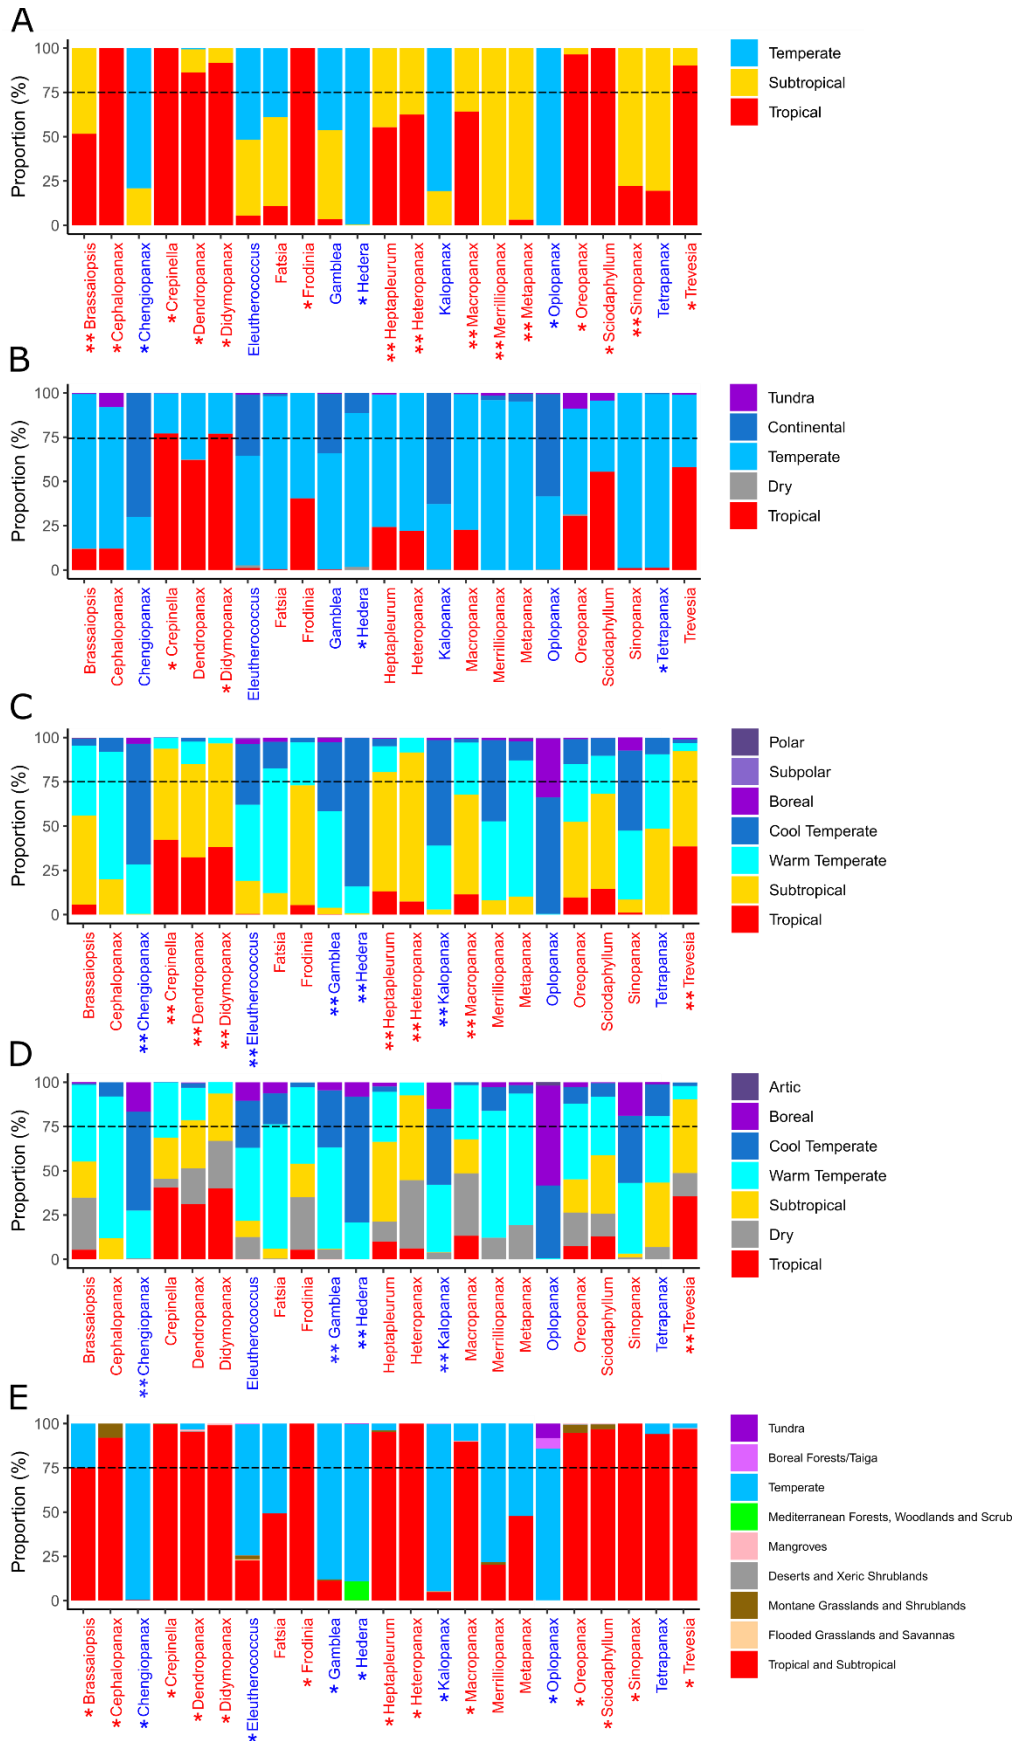

977

978

979 Figure 6.

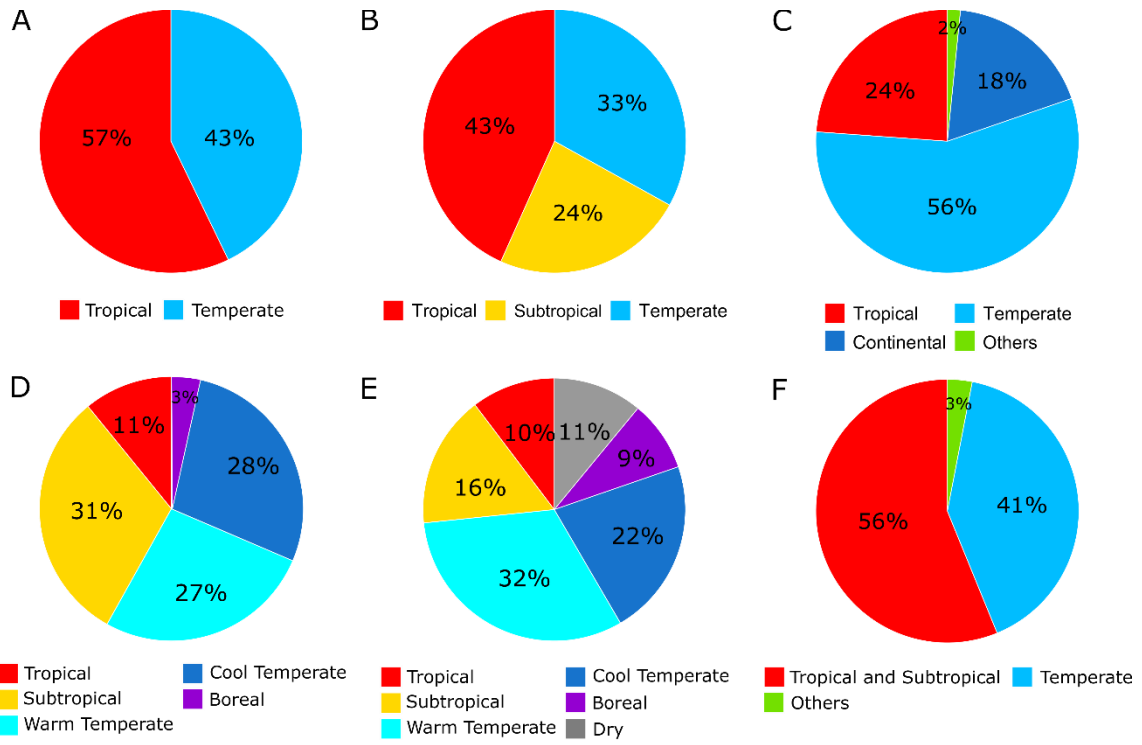

980
